# Supplementary material for: Genome Wide Association Mapping of Grain and Straw Biomass Traits in the Rice Bengal and Assam Aus Panel (BAAP) Grown Under Alternate Wetting and Drying and Permanently Flooded Irrigation
Source: Front Plant Sci. 2018 Sep 3;9:1223. doi: 10.3389/fpls.2018.01223 (PMC6129953; doi:10.3389/fpls.2018.01223)
Supplement: FILE S1 — The BAAP accession details, sequence metadata, subgroup attribution, and phenotype data. [file Data_Sheet_1.XLSX]

## Sheet: Identity and sequence meta-data
BAAP no.	cultivar name	Name used in 511 phylogeny analysis (Travis et al. 2015)	IRGC ID	GSOR ID	days to 80% heading in IRRI	Country of origin / collection	Used in GWAS?	If no, why not?	FastSTRUCTURE Group	FastSTRUCTURE Group 1	FastSTRUCTURE Group 2	FastSTRUCTURE Group 3	FastSTRUCTURE Group 4	FastSTRUCTURE Group 5	sequencing code	Data Sample ID	# pairs of reads	# Total Reads	Yield (Mbp)	Estimated Coverage (430Mb reference)	R1 Q30 (up to base)	R2 Q30 (up to base)
1	ASSAM 4(BORO)	AWD006-ASSAM-4BORO-FT80	11482	-	80	India	Yes		3	0	0	1	0	0	S31	674_LIB3817_LDI3333	10355516	20711032	2071.1	4.81652	101	99
2	ARC 5959	AWD007-ARC-5959-FT84	12160	-	84	India	Yes		2	0.136318	0.863682	0	0	0	S32	699_LIB4036_LDI3621	21279855	42559710	4255.97	9.89761	101	84
3	ARC 5960	AWD008-ARC-5960-FT80	12161	-	80	India	Yes		2	0	1	0	0	0	S33	674_LIB3818_LDI3334	17469545	34939090	3493.91	8.12537	101	99
4	ARC 5977	AWD009-ARC-5977-FT80	12166	-	80	India	Yes		2	0	1	0	0	0	S34	830_LIB5614_LDI4938_GATCAG_L005	19164854	38329708	7665.94	17.8278	99	94
5	ARC 6000	AWD010-ARC-6000-FT86	12172	-	86	India	Yes		4	0	0	0	1	0	S35	699_LIB4037_LDI3622	7463729	14927458	1492.75	3.4715	101	84
6	ARC 6240	AWD012-ARC-6240-FT84	12263	-	84	India	Yes		Admix	0.719391	0.28058	0	2.8e-05	0	S36	674_LIB3819_LDI3335	12238946	24477892	2447.79	5.69253	101	99
7	ARC 7325	AWD013-ARC-7325-FT80	12366	-	80	India	Yes		1	0.883687	0	0	0.116313	0	S37	674_LIB3820_LDI3336	11351551	22703102	2270.31	5.27979	101	99
8	ARC 10958	AWD014-ARC-10958-FT84	12685	-	84	India	Yes		4	0	0	0	1	0	S38	674_LIB3821_LDI3337	15207774	30415548	3041.55	7.07338	101	99
9	AS 2	AWD015---FT80	16320	-	80	India	Yes		Admix	0	0	0.761281	0.238718	0	S39	674_LIB3822_LDI3338	9433170	18866340	1886.63	4.38752	101	99
10	ARC 10392	AWD022-ARC-10392-FT74	20901	-	74	India	Yes		Admix	0.654341	0.345659	0	0	0	S40	674_LIB3823_LDI3339	5332356	10664712	1066.47	2.48017	101	99
11	ARC 11205	AWD023-ARC-11205-FT80	21224	-	80	India	Yes		Admix	0	0.773744	0	0.211909	0.014347	S41	830_LIB5615_LDI4949_TAGCTT_L005	3062802	6125604	1225.12	2.84912	101	99
12	ARC 11340	AWD025-ARC-11340-FT80	21331	-	80	India	Yes		2	0	1	0	0	0	S42	699_LIB4038_LDI3623	6352963	12705926	1270.59	2.95487	101	84
13	ARC 11600	AWD026-ARC-11600-FT74	21507	-	74	India	Yes		Admix	0.202626	0.797373	0	0	0	S43	674_LIB3824_LDI3340	10395020	20790040	2079	4.83489	101	94
14	AUS MURALI	AWD028-AUS-MURALI-FT74	25834	-	74	Bangladesh	Yes		4	0	0	0	1	0	S44	674_LIB3825_LDI3341	13069544	26139088	2613.91	6.07886	99	94
15	BOWALIA	AWD030-BOWALIA-FT80	27537	-	80	Bangladesh	Yes		1	1	0	0	0	0	S45	633_LIB3211_LDI2701	3134003	6268006	626.801	1.45768	101	101
16	BOWALIA 2	AWD031-BOWALIA-2-FT80	27538	-	80	Bangladesh	Yes		Admix	0.715399	0	0	0	0.2846	S46	633_LIB3212_LDI2702	10749539	21499078	2149.91	4.99979	101	101
17	AUS 12	AWD034-AUS-12-FT74	28875	-	74	Bangladesh	Yes		Admix	0.080683	0.521843	0	0	0.397474	S47	830_LIB5616_LDI4939_GGCTAC_L005	9980233	19960466	3992.09	9.28394	99	94
18	AUS 16	AWD035-AUS-16-FT80	28879	-	80	Bangladesh	Yes		Admix	0	0.563783	0	0	0.436217	S48	633_LIB3213_LDI2703	4684054	9368108	936.811	2.17863	101	99
19	AUS 22	AWD036-AUS-22-FT80	28885	-	80	Bangladesh	Yes		Admix	0.128694	0.362154	0	0.00022	0.508932	S49	699_LIB4039_LDI3624	8226102	16452204	1645.22	3.82609	101	84
20	AUS 28	AWD038-AUS-28-FT80	28891	-	80	Bangladesh	No	Not enough plants from Nursurey in Mymensingh 2013	5	0	0	0	0	1	S50	830_LIB5617_LDI4940_CTTGTA_L005	9004375	18008750	3601.75	8.37616	101	99
21	AUS 29	AWD039-AUS-29-FT80	28892	-	80	Bangladesh	Yes		Admix	0	0.55912	0	0	0.440879	S51	830_LIB5618_LDI4941_AGTCAA_L005	9351900	18703800	3740.76	8.69944	99	94
22	AUS 31	AWD040-AUS-31-FT74	28894	-	74	Bangladesh	Yes		Admix	0.110215	0.049775	0.018391	0.063794	0.757826	S52	830_LIB5619_LDI4942_AGTTCC_L005	4555352	9110704	1822.14	4.23754	99	94
23	AUS 37	AWD042-AUS-37-FT80	28900	-	80	Bangladesh	Yes		Admix	0	0.624115	0	0	0.375885	S53	830_LIB5620_LDI4943_ATGTCA_L005	5714659	11429318	2285.86	5.31596	99	94
24	AUS 46	AWD045-AUS-46-FT80	28909	-	80	Bangladesh	Yes		Admix	0.080923	0.523291	0	0	0.395786	S54	699_LIB4040_LDI3625	8324211	16648422	1664.84	3.87173	101	79
25	AUS 60	AWD046-AUS-60-FT80	28923	-	80	Bangladesh	Yes		Admix	0	0.749245	0	0.068165	0.18259	S55	830_LIB5621_LDI4944_CCGTCC_L005	4278008	8556016	1711.2	3.97954	101	101
26	AUS 62	AWD047-AUS-62-FT80	28925	-	80	Bangladesh	Yes		Admix	0.113543	0.142001	0.098174	0.455936	0.190347	S56	830_LIB5622_LDI4945_GTCCGC_L005	14379332	28758664	5751.73	13.3761	101	101
27	AUS 63	AWD048-AUS-63-FT84	28926	-	84	Bangladesh	Yes		5	0	0	0	0	1	S57	830_LIB5623_LDI4946_GTGAAA_L005	10430438	20860876	4172.18	9.70273	101	101
28	AUS 67	AWD050-AUS-67-FT84	28930	-	84	Bangladesh	Yes		Admix	0.194797	0.614376	0.009196	0.004706	0.176925	S58	633_LIB3214_LDI2704	7807371	15614742	1561.47	3.63134	101	101
29	AUS 68	AWD051-AUS-68-FT84	28931	-	84	Bangladesh	Yes		5	0.138455	0.05374	0	0	0.807804	S59	830_LIB5624_LDI4947_GTGGCC_L005	10295882	20591764	4118.35	9.57756	101	99
30	AUS 74	AWD053-AUS-74-FT80	28937	-	80	Bangladesh	Yes		Admix	0	0	0.170688	0.774936	0.054376	S60	633_LIB3215_LDI2705	3730531	7461062	746.106	1.73513	101	101
31	AUS 77	AWD054-AUS-77-FT80	28940	-	80	Bangladesh	Yes		Admix	0.681843	0	0	0	0.318157	S61	830_LIB5625_LDI4948_GTTTCG_L005	10776762	21553524	4310.7	10.0249	101	101
32	AUS 89	AWD055-AUS-89-FT84	28952	-	84	Bangladesh	Yes		Admix	0.372585	0.306513	0	0	0.320902	S62	830_LIB5626_LDI4950_ATCACG_L001	8274463	16548926	3309.79	7.69717	101	101
33	AUS 93	AWD056-AUS-93-FT84	28955	-	84	Bangladesh	Yes		Admix	0	0.577599	0	0	0.422401	S63	633_LIB3216_LDI2706	13352636	26705272	2670.53	6.21053	101	101
34	AUS 96	AWD057-AUS-96-FT84	28958	-	84	Bangladesh	Yes		Admix	0.593981	0	0	0	0.406019	S64	830_LIB5627_LDI4951_CGATGT_L001	7791191	15582382	3116.48	7.24762	101	101
35	AUS 99	AWD058-AUS-99-FT84	28961	-	84	Bangladesh	Yes		Admix	0.655015	0	0	0	0.344985	S65	830_LIB5628_LDI4952_TTAGGC_L001	8206666	16413332	3282.67	7.63411	101	101
36	AUS 100	AWD059-AUS-100-FT80	28962	-	80	Bangladesh	Yes		Admix	0.678172	0	0	0.004609	0.317218	S66	674_LIB3826_LDI3342	6051974	12103948	1210.39	2.81487	101	99
37	AUS 105	AWD060-AUS-105-FT84	28964	-	84	Bangladesh	Yes		5	0	0	0	0	1	S67	830_LIB5629_LDI4953_TGACCA_L001	7529462	15058924	3011.78	7.00415	101	101
38	AUS 125	AWD061-AUS-125-FT80	28979	-	80	Bangladesh	Yes		1	1	0	0	0	0	S68	830_LIB5630_LDI4954_ACAGTG_L001	9544488	19088976	3817.8	8.87859	101	101
39	AUS 127	AWD062-AUS-127-FT80	28981	-	80	Bangladesh	Yes		5	0.01877	0.007882	0	0	0.973348	S69	830_LIB5631_LDI4955_GCCAAT_L001	9003961	18007922	3601.58	8.37578	101	99
40	AUS 130	AWD063-AUS-130-FT80	28984	-	80	Bangladesh	Yes		5	0	0	0	0	1	S70	830_LIB5632_LDI4956_CAGATC_L001	8181050	16362100	3272.42	7.61028	101	101
41	AUS 131	AWD064-AUS-131-FT80	28985	-	80	Bangladesh	Yes		1	1	0	0	0	0	S71	830_LIB5633_LDI4957_ACTTGA_L001	7142030	14284060	2856.81	6.64375	101	101
42	AUS 136	AWD065-AUS-136-FT74	28987	-	74	Bangladesh	Yes		5	0.000129	0	0	0	0.999871	S72	830_LIB5634_LDI4958_GATCAG_L001	9222073	18444146	3688.83	8.57867	99	99
43	AUS 151	AWD068-AUS-151-FT84	28994	-	84	Bangladesh	Yes		Admix	0.045266	0.043217	0	0.762016	0.149501	S73	699_LIB4041_LDI3626	9149676	18299352	1829.94	4.25566	101	79
44	AUS 152	AWD069-AUS-152-FT84	28995	-	84	Bangladesh	Yes		5	0	0	0	0	1	S74	674_LIB3827_LDI3346	9802790	19605580	1960.56	4.55944	99	79
45	AUS 154	AWD070-AUS-154-FT84	28997	-	84	Bangladesh	Yes		4	0	0	0	1	0	S75	699_LIB4042_LDI3627	4010773	8021546	802.155	1.86548	99	74
46	AUS 169	AWD072-AUS-169-FT84	29003	-	84	Bangladesh	Yes		Admix	0.648814	0	0	0.076374	0.274812	S76	699_LIB4043_LDI3628	9993301	19986602	1998.66	4.64805	101	84
47	AUS 175	AWD073-AUS-175-FT74	29007	-	74	Bangladesh	Yes		Admix	0	0	0.129978	0.733424	0.136598	S77	674_LIB3828_LDI3347	8063806	16127612	1612.76	3.75061	101	89
48	AUS 180	AWD074-AUS-180-FT80	29010	-	80	Bangladesh	Yes		Admix	0.65895	0	0	0	0.34105	S78	674_LIB3829_LDI3348	16071224	32142448	3214.24	7.47499	101	99
49	AUS 204	AWD076-AUS-204-FT80	29022	-	80	Bangladesh	Yes		Admix	0.374066	0.334964	0	0	0.290969	S79	674_LIB3830_LDI3349	13228548	26457096	2645.71	6.15281	101	101
50	AUS 209	AWD078-AUS-209-FT74	29027	-	74	Bangladesh	No	Not enough plants from Nursurey in Mymensingh 2013	Admix	0.627649	0.371563	0.000788	0	0	S80	830_LIB5635_LDI4959_TAGCTT_L001	11378319	22756638	4551.33	10.5845	101	101
51	AUS 210	AWD079-AUS-210-FT74	29028	-	74	Bangladesh	No	Not enough plants from Nursurey in Mymensingh 2013	Admix	0.592787	0	0	0	0.407213	S81	699_LIB4044_LDI3629	9927778	19855556	1985.56	4.61757	101	84
52	AUS 228	AWD082-AUS-228-FT84	29034	-	84	Bangladesh	Yes		Admix	0.523942	0.286045	0	0.130623	0.059389	S82	699_LIB4045_LDI3630	17130216	34260432	3426.04	7.96754	101	84
53	AUS 267	AWD089-AUS-267-FT80	29058	-	80	Bangladesh	Yes		Admix	0.659296	0	0	0.20632	0.134383	S83	699_LIB4046_LDI3631	7272288	14544576	1454.46	3.38246	101	79
54	AUS 268	AWD090-AUS-268-FT84	29059	-	84	Bangladesh	Yes		Admix	0.720579	0	0	0.271963	0.007459	S84	830_LIB5636_LDI4960_GGCTAC_L001	8083286	16166572	3233.31	7.51934	101	101
55	AUS 273	AWD092-AUS-273-FT80	29063	-	80	Bangladesh	Yes		Admix	0.537764	0	0	0	0.462236	S85	830_LIB5637_LDI4961_CTTGTA_L001	10536071	21072142	4214.43	9.801	101	99
56	AUS 277	AWD094-AUS-277-FT80	29067	-	80	Bangladesh	Yes		Admix	0.210026	0	0	0	0.789974	S86	699_LIB4047_LDI3632	7034796	14069592	1406.96	3.272	101	79
57	AUS 280	AWD095-AUS-280-FT84	29070	-	84	Bangladesh	Yes		5	0	0	0	0	1	S87	633_LIB3217_LDI2707	10998296	21996592	2199.66	5.11549	101	101
58	AUS 283	AWD096-AUS-283-FT84	29073	-	84	Bangladesh	Yes		Admix	0.71814	0	0	0	0.281859	S88	674_LIB3831_LDI3350	9624485	19248970	1924.9	4.4765	101	99
59	AUS 293	AWD098-AUS-293-FT80	29081	-	80	Bangladesh	Yes		Admix	0.567587	0	0.073443	0.103628	0.255341	S89	699_LIB4048_LDI3633	7364205	14728410	1472.84	3.42521	101	79
60	AUS 294	AWD099-AUS-294-FT80	29082	-	80	Bangladesh	Yes		5	0.026668	0	0	0	0.973332	S90	674_LIB3832_LDI3351	5696434	11392868	1139.29	2.6495	101	89
61	AUS 298	AWD100-AUS-298-FT74	29086	-	74	Bangladesh	No	Not enough plants from Nursurey in Mymensingh 2013	Admix	0.302067	0	0.131724	0.56621	0	S91	674_LIB3833_LDI3352	9386374	18772748	1877.27	4.36576	99	84
62	AUS 309	AWD101-AUS-309-FT80	29097	-	80	Bangladesh	Yes		3	0	0	1	0	0	S92	674_LIB3834_LDI3353	18241202	36482404	3648.24	8.48428	101	99
63	AUS 314	AWD102-AUS-314-FT84	29101	-	84	Bangladesh	Yes		Admix	0.034094	0.520405	0	0	0.445501	S93	674_LIB3835_LDI3354	10915175	21830350	2183.03	5.07683	99	79
64	AUS 317	AWD103-AUS-317-FT85	29104	-	85	Bangladesh	Yes		Admix	0.349944	0.171879	0	0	0.478177	S94	674_LIB3836_LDI3355	14474708	28949416	2894.94	6.73242	99	84
65	AUS 321	AWD105-AUS-321-FT80	29108	-	80	Bangladesh	Yes		Admix	0.654861	0.042957	0	0	0.302181	S95	674_LIB3837_LDI3356	8209339	16418678	1641.87	3.8183	99	94
66	AUS 323	AWD106-AUS-323-FT84	29110	-	84	Bangladesh	Yes		5	0	0	0	0	1	S96	674_LIB3838_LDI3357	10620019	21240038	2124	4.93954	101	99
67	AUS 328	AWD108-AUS-328-FT85	29115	-	85	Bangladesh	Yes		5	0	0	0	0	1	S97	699_LIB4049_LDI3634	7440713	14881426	1488.14	3.4608	101	79
68	AUS 335	AWD110-AUS-335-FT85	29122	-	85	Bangladesh	Yes		Admix	0.225294	0	0	0.299668	0.475037	S98	674_LIB3839_LDI3358	8694951	17389902	1738.99	4.04416	101	99
69	AUS 350	AWD114-AUS-350-FT80	29137	-	80	Bangladesh	Yes		1	0.990702	0	0	0.009298	0	S99	830_LIB5638_LDI4962_AGTCAA_L001	8337432	16674864	3334.97	7.75575	101	99
70	AUS 353	AWD115-AUS-353-FT80	29140	-	80	Bangladesh	Yes		Admix	0.197563	0	0	0.335705	0.466732	S100	830_LIB5639_LDI4963_AGTTCC_L001	5975666	11951332	2390.27	5.55876	101	99
71	AUS 354	AWD116-AUS-354-FT80	29141	-	80	Bangladesh	Yes		Admix	0.425793	0	0	0.574206	0	S101	830_LIB5640_LDI4964_ATGTCA_L001	6896403	13792806	2758.56	6.41526	99	99
72	AUS 361	AWD120-AUS-361-FT80	29148	-	80	Bangladesh	Yes		Admix	0.629399	0	0	0	0.370601	S102	699_LIB4050_LDI3635	7336834	14673668	1467.37	3.41248	101	84
73	AUS 362	AWD121-AUS-362-FT80	29149	-	80	Bangladesh	Yes		Admix	0.656799	0	0	0	0.343201	S103	633_LIB3218_LDI2708	4567560	9135120	913.512	2.12445	101	101
74	AUS 364	AWD122-AUS-364-FT80	29151	-	80	Bangladesh	Yes		Admix	0.322175	0.030326	0	0	0.647499	S104	699_LIB4051_LDI3636	9523449	19046898	1904.69	4.42951	101	84
75	AUS 366	AWD123-AUS-366-FT80	29152	-	80	Bangladesh	Yes		1	1	0	0	0	0	S105	830_LIB5641_LDI4965_CCGTCC_L001	7764859	15529718	3105.94	7.22312	101	101
76	AUS 369	AWD124-AUS-369-FT80	29155	-	80	Bangladesh	Yes		1	1	0	0	0	0	S106	830_LIB5642_LDI4966_GTCCGC_L001	6137991	12275982	2455.2	5.70976	101	101
77	AUS 382	AWD126-AUS-382-FT85	29166	-	85	Bangladesh	Yes		Admix	0.380974	0.329177	0	8.5e-05	0.289763	S107	830_LIB5643_LDI4967_GTGAAA_L001	6272215	12544430	2508.89	5.83462	101	101
78	AUS 385	AWD127-AUS-385-FT80	29169	-	80	Bangladesh	Yes		5	0	0	0	0	1	S108	633_LIB3219_LDI2709	5758957	11517914	1151.79	2.67858	101	101
79	AUS 391	AWD129-AUS-391-FT85	29175	-	85	Bangladesh	Yes		Admix	0.536585	0	0	0	0.463415	S109	830_LIB5644_LDI4968_GTGGCC_L001	9172751	18345502	3669.1	8.53279	101	101
80	AUS 401	AWD131-AUS-401-FT85	29185	-	85	Bangladesh	Yes		5	0.101764	0	0	0	0.898235	S110	699_LIB4052_LDI3637	7080113	14160226	1416.02	3.29308	101	84
81	AUS 411	AWD132-AUS-411-FT80	29195	-	80	Bangladesh	Yes		5	0	0	0	0	1	S111	633_LIB3220_LDI2710	5387945	10775890	1077.59	2.50602	101	99
82	AUS 414	AWD134-AUS-414-FT80	29197	-	80	Bangladesh	Yes		5	0.000347	0.023131	0	0	0.976522	S112	674_LIB3840_LDI3359	16420909	32841818	3284.18	7.63763	101	99
83	AUS 415	AWD135-AUS-415-FT80	29198	-	80	Bangladesh	Yes		5	0	0	0	0	1	S113	674_LIB3841_LDI3360	7197170	14394340	1439.43	3.34752	99	94
84	AUS 417	AWD136-AUS-417-FT80	29200	-	80	Bangladesh	Yes		5	0	0	0	0	1	S114	674_LIB3842_LDI3361	6547377	13094754	1309.48	3.04529	101	99
85	AUS 420	AWD137-AUS-420-FT85	29203	-	85	Bangladesh	Yes		Admix	0.152275	0.643415	5.4e-05	0	0.204256	S115	674_LIB3843_LDI3362	9644668	19289336	1928.93	4.48589	101	94
86	AUS 435	AWD138-AUS-435-FT85	29217	-	85	Bangladesh	Yes		Admix	0.001834	0.319895	0	0	0.678271	S116	674_LIB3844_LDI3363	6182410	12364820	1236.48	2.87554	99	79
87	AUS 440	AWD139-AUS-440-FT85	29222	-	85	Bangladesh	Yes		Admix	0.081707	0.63124	0	0	0.287052	S117	674_LIB3845_LDI3364	9494855	18989710	1898.97	4.41621	101	99
88	AUS 453	AWD143-AUS-453-FT85	29233	-	85	Bangladesh	Yes		Admix	0.142892	0.25206	0	0	0.605048	S118	699_LIB4053_LDI3638	7758940	15517880	1551.79	3.60881	101	84
89	AUS 455	AWD144-AUS-455-FT80	29235	-	80	Bangladesh	Yes		Admix	0	0	0	0.240751	0.759249	S119	699_LIB4054_LDI3639	6655960	13311920	1331.19	3.0958	101	84
90	AUS 462	AWD145-AUS-462-FT85	29240	-	85	Bangladesh	Yes		Admix	0	0.313591	0	0	0.686409	S120	699_LIB4055_LDI3640	14443413	28886826	2888.68	6.71787	101	84
91	AUS 464	AWD146-AUS-464-FT80	29242	-	80	Bangladesh	Yes		Admix	0	0	0	0.458426	0.541574	S121	674_LIB3846_LDI3365	9878598	19757196	1975.72	4.5947	101	99
92	BORO 354	AWD151-BORO-354-FT91	29295	-	91	Bangladesh	Yes		3	0	0	1	0	0	S122	674_LIB3847_LDI3366	5674864	11349728	1134.97	2.63947	101	99
93	BALAM AUS	AWD155-BALAM-AUS-FT80	34835	-	80	India	Yes		5	0	0	0	0	1	S123	830_LIB5645_LDI4969_GTTTCG_L001	8915651	17831302	3566.26	8.29363	101	101
94	BORO	AWD156-BORO-FT85	34866	-	85	India	Yes		Admix	0.199481	0	0.384608	0.415912	0	S124	674_LIB3848_LDI3367	5124735	10249470	1024.95	2.3836	101	99
95	BORO BLACK	AWD157---FT74	36139	-	74	India	No	Not enough plants from Nursurey in Mymensingh 2013	4	0	0	0	1	0	S125	699_LIB4056_LDI3641	9186942	18373884	1837.39	4.273	101	84
96	BCULARN	AWD158---FT80	36826	-	80	Bangladesh	Yes		Admix	0	0	0.326014	0.673986	0	S126	830_LIB5646_LDI4970_ATCACG_L002	5966308	11932616	2386.52	5.55005	101	101
97	AUSMERI	AWD159-AUSMERI-FT80	37359	-	80	Bangladesh	Yes		Admix	0.293382	0	0	0.225431	0.481187	S127	699_LIB4057_LDI3642	9497096	18994192	1899.42	4.41725	101	84
98	ARC 14108	AWD161-ARC-14108-FT85	41404	-	85	Bangladesh	Yes		Admix	0.446247	0.553753	0	0	0	S128	830_LIB5647_LDI4971_CGATGT_L002	6258139	12516278	2503.26	5.82152	101	101
99	ARC 14855	AWD162-ARC-14855-FT80	41790	-	80	India	Yes		4	0	0	0	1	0	S129	699_LIB4058_LDI3643	7661301	15322602	1532.26	3.5634	101	84
100	ARC 14915	AWD164-ARC-14915-FT91	41818	-	91	India	Yes		Admix	0.391066	0	0	0	0.608934	S130	674_LIB3849_LDI3368	9114680	18229360	1822.94	4.23939	99	89
101	ARC 14950	AWD165-ARC-14950-FT85	41833	-	85	India	Yes		Admix	0.129516	0.227387	0	0.37256	0.270537	S131	674_LIB3850_LDI3369	11036737	22073474	2207.35	5.13337	101	99
102	ARC 14965	AWD168-ARC-14965-FT80	41842	-	80	India	Yes		Admix	0.347946	0	0	0.652054	0	S132	674_LIB3851_LDI3370	6466154	12932308	1293.23	3.00751	101	99
103	ARC 14969	AWD169-ARC-14969-FT80	41844	-	80	India	Yes		Admix	0.236393	0	0	0.763607	0	S133	674_LIB3852_LDI3371	8262203	16524406	1652.44	3.84289	101	99
104	ARC 7098	AWD174-ARC-7098-FT80	44027	-	80	India	Yes		Admix	0.664978	0	0	0.335022	0	S134	699_LIB4059_LDI3644	11400157	22800314	2280.03	5.3024	101	84
105	BROWN GORA S.B. 92	AWD175-BROWN-GORA-S.B.-92-FT80	44855	-	80	India	Yes		4	0	0	0.197257	0.802743	0	S135	674_LIB3853_LDI3372	8113796	16227592	1622.76	3.77386	94	79
106	AUS PADDY(BLACK)	AWD181-AUS-PADDYBLACK-FT80	44975	-	80	India	Yes		Admix	0.315707	0	0	0.684293	0	S136	674_LIB3854_LDI3373	7058810	14117620	1411.76	3.28317	101	99
107	AUS PADDY(WHITE)	AWD182-AUS-PADDYWHITE-FT80	44979	-	80	India	Yes		2	0	0.820099	0	0	0.179901	S137	674_LIB3855_LDI3374	9210700	18421400	1842.14	4.28405	101	99
108	ANJANI	AWD190-ANJANI-FT74	52607	-	74	India	Yes		Admix	0.024308	0.440679	0	0.164011	0.371001	S138	699_LIB4060_LDI3645	10145555	20291110	2029.11	4.71886	101	84
109	BAUSPHR	AWD192-BAUSPHR-FT85	52622	-	85	India	Yes		Admix	0.006837	0.615948	3.2e-05	0.122291	0.254891	S139	699_LIB4061_LDI3646	9265055	18530110	1853.01	4.30933	101	84
110	BIR CONA	AWD194-BIR-CONA-FT80	53480	-	80	Bangladesh	Yes		5	0.133257	0.016433	0	0	0.85031	S140	699_LIB4062_LDI3647	10377338	20754676	2075.47	4.82667	101	84
111	AUS KUSHI	AWD197-AUS-KUSHI-FT80	66688	-	80	Bangladesh	Yes		Admix	0.325325	0	0	0	0.674675	S141	699_LIB4063_LDI3648	17331921	34663842	3466.38	8.06136	101	84
112	MTU18	AWD204-MTU18-FT85	660	-	85	India	No	Not enough plants from Nursurey in Mymensingh 2013	Admix	0	0.204623	0.174378	0.564785	0.056215	S142	674_LIB3856_LDI3375	12490675	24981350	2498.14	5.80962	101	99
113	SLO 19	AWD205-SLO-19-FT80	689	-	80	India	Yes		Admix	0	0.548654	0.131887	0.228154	0.091304	S143	674_LIB3857_LDI3376	8959216	17918432	1791.84	4.16708	89	79
114	EARLY SUTARSAR 39	AWD208-EARLY-SUTARSAR-39-FT85	6255	-	85	India	Yes		Admix	0	0.354052	0.170743	0.319583	0.155622	S144	674_LIB3858_LDI3377	10903761	21807522	2180.75	5.07152	101	99
115	PHULPATTAS 72	AWD209-PHULPATTAS-72-FT85	6263	-	85	India	Yes		Admix	0	0.743779	0	0.256221	0	S145	830_LIB5648_LDI4972_TTAGGC_L002	8673668	17347336	3469.47	8.06853	101	101
116	DA 12	AWD211---FT80	6369	-	80	Bangladesh	Yes		5	0	0	0	0	1	S146	699_LIB4064_LDI3649	7847214	15694428	1569.44	3.64987	101	84
117	KADA-68-1	AWD213-KADA-68-1-FT80	6406	-	80	India	Yes		4	0	0.04211	0.072264	0.885626	0	S147	674_LIB3859_LDI3378	10804077	21608154	2160.82	5.02515	101	99
118	DF3	AWD217-DF3-FT80	8363	-	80	Bangladesh	Yes		1	0.858875	0	0	0.141124	0	S148	699_LIB4065_LDI3650	10610665	21221330	2122.13	4.93519	101	84
119	CTG250	AWD218-CTG250-FT80	8676	-	80	Bangladesh	Yes		Admix	0.10315	0.697113	0.014881	0	0.184856	S149	699_LIB4066_LDI3651	8238338	16476676	1647.67	3.83179	101	84
120	JW102	AWD224-JW102-FT85	9164	-	85	India	Yes		4	0	0.029526	0.099519	0.870955	0	S150	699_LIB4067_LDI3652	5784678	11569356	1156.94	2.69055	101	79
121	KHAILAORGOABEZ	AWD225-KHAILAORGOABEZ-FT80	9947	-	80	India	Yes		3	0	0	1	0	0	S151	674_LIB3860_LDI3379	13244824	26489648	2648.96	6.16038	101	99
122	KELE(AUS)	AWD226-KELEAUS-FT74	11486	-	74	India	Yes		Admix	0	0	0.229566	0.770434	0	S152	674_LIB3861_LDI3380	9885404	19770808	1977.08	4.59786	101	99
123	CHAMKA	AWD227-CHAMKA-FT80	25844	-	80	Bangladesh	Yes		Admix	0	0	0.373095	0.626905	0	S153	830_LIB5649_LDI4973_TGACCA_L002	8352995	16705990	3341.2	7.77023	101	101
124	KALOSHAITA	AWD228-KALOSHAITA-FT80	25878	-	80	Bangladesh	Yes		1	0.937123	0	0	0.062877	0	S154	830_LIB5650_LDI4974_ACAGTG_L002	13089136	26178272	5235.65	12.1759	101	101
125	KUMBI	AWD229-KUMRI-FT74	25883	-	74	Bangladesh	Yes		Admix	0.275459	0	0	0	0.724541	S155	699_LIB4068_LDI3653	12541883	25083766	2508.38	5.83343	101	79
126	MUNSHISHAIL	AWD230-MUNSHISHAIL-FT80	25908	-	80	Bangladesh	Yes		Admix	0.116969	0.505465	0	0	0.377566	S156	633_LIB3221_LDI2711	3326736	6653472	665.347	1.54732	101	101
127	SHONI	AWD231-SHONI-FT80	25922	-	80	Bangladesh	Yes		1	0.970948	0	0	0	0.029052	S157	699_LIB4069_LDI3654	11835669	23671338	2367.13	5.50496	101	79
128	PURA NUKNA	AWD233-PURA-NUKNA-FT80	26413	-	80	Bangladesh	Yes		1	0.850992	0	0	0.149007	0	S158	699_LIB4070_LDI3655	6845612	13691224	1369.12	3.18401	101	79
129	CUNAIL	AWD237-CUNAIL-FT85	27512	-	85	Bangladesh	Yes		3	0	0	1	0	0	S159	830_LIB5651_LDI4975_GCCAAT_L002	7561562	15123124	3024.62	7.03401	99	99
130	FAISHA MANSA	AWD238-FAISHA-MANSA-FT74	27543	-	74	Bangladesh	No	Not enough plants from Nursurey in Mymensingh 2013	Admix	0.780623	0	0	0	0.219377	S160	699_LIB4071_LDI3656	5726326	11452652	1145.27	2.66341	101	79
131	KANCHA NONI	AWD239-KANCHA-NONI-FT80	27557	-	80	Bangladesh	Yes		Admix	0.126031	0.403759	0	0	0.47021	S161	830_LIB5652_LDI4976_CAGATC_L002	6485566	12971132	2594.23	6.03308	101	101
132	PHUL DUMRA	AWD240-PHUL-DUMRA-FT74	27576	-	74	Bangladesh	Yes		Admix	0.595613	0.280808	0	0	0.123578	S162	699_LIB4072_LDI3657	5950478	11900956	1190.1	2.76766	101	84
133	DHALIBORO 105-2	AWD243-DHALIBORO-105-2-FT85	29314	-	85	Bangladesh	Yes		3	0	0	1	0	0	S163	633_LIB3222_LDI2712	8139326	16278652	1627.87	3.78573	101	99
134	DHALIBORO 111-3	AWD244-DHALIBORO-111-3-FT85	29315	-	85	Bangladesh	No	Very low sequence depth (0.85x)							S164	674_LIB3862_LDI3381	1824571	3649142	364.914	0.848638	101	99
135	KALIBORO 2-2	AWD245-KALIBORO-2-2-FT85	29353	-	85	Bangladesh	Yes		3	0	0	1	0	0	S165	699_LIB4073_LDI3658	10036563	20073126	2007.31	4.66817	101	84
136	KALIBORO 26	AWD246-KALIBORO-26-FT85	29355	-	85	Bangladesh	Yes		3	0	0	1	0	0	S166	674_LIB3863_LDI3382	8601696	17203392	1720.34	4.00079	101	99
137	KALIBORO 41-1	AWD247-KALIBORO-41-1-FT85	29356	-	85	Bangladesh	Yes		3	0	0	1	0	0	S167	830_LIB5653_LDI4977_ACTTGA_L002	6186853	12373706	2474.74	5.75521	99	99
138	KALIBORO 80-3	AWD248-KALIBORO-80-3-FT85	29358	-	85	Bangladesh	Yes		3	0	0	1	0	0	S168	699_LIB4074_LDI3659	12694463	25388926	2538.89	5.9044	101	84
139	KALIBORO 138-2	AWD249-KALIBORO-138-2-FT85	29361	-	85	Bangladesh	Yes		3	0	0	1	0	0	S169	699_LIB4075_LDI3660	10824967	21649934	2164.99	5.03487	101	84
140	KALIBORO 704	AWD250-KALIBORO-704-FT85	29368	-	85	Bangladesh	Yes		3	0	0	1	0	0	S170	699_LIB4076_LDI3661	9726667	19453334	1945.33	4.52403	101	84
141	KAL BURI	AWD256-KAL-BURI-FT80	31588	-	80	Bangladesh	Yes		1	0.803185	0	0	0.196815	0	S171	699_LIB4077_LDI3662	10047305	20094610	2009.46	4.67317	101	84
142	SHADA BORO	AWD269-SHADA-BORO-FT86	34752	-	86	Bangladesh	Yes		3	0	0	1	0	0	S172	830_LIB5654_LDI4978_GATCAG_L002	4127533	8255066	1651.01	3.83957	101	99
143	JAGAL-1640 A	AWD270-JAGAL-1640-A-FT80	34800	-	80	India	Yes		3	0.048737	0	0.951263	0	0	S173	674_LIB3864_LDI3383	9179991	18359982	1836	4.26976	101	99
144	CHANDRA KANA	AWD271-CHANDRA-KANA-FT80	34876	-	80	India	Yes		Admix	0.245826	0.003013	0.029819	0.488878	0.232465	S174	674_LIB3865_LDI3384	6909392	13818784	1381.88	3.21367	101	99
145	CHANDRA MUKHI	AWD272-CHANDRA-MUKHI-FT86	34880	-	86	India	Yes		1	0.935477	0	0	0.064523	0	S175	699_LIB4078_LDI3663	11547921	23095842	2309.58	5.37113	101	84
146	GOHAMA BHADRI	AWD273-GOHAMA-BHADRI-FT80	34917	-	80	India	Yes		Admix	0	0	0.278248	0.721752	0	S176	699_LIB4079_LDI3664	8944448	17888896	1788.89	4.16021	101	84
147	HIJLI	AWD274-HIJLI-FT80	34925	-	80	India	Yes		1	0.999113	0	0	0.000887	0	S177	699_LIB4080_LDI3665	8837931	17675862	1767.59	4.11067	101	84
148	JAGAL	AWD275-JAGAL-FT80	34928	-	80	India	Yes		Admix	0.333076	0	0	0	0.666924	S178	674_LIB3866_LDI3385	8968068	17936136	1793.61	4.17119	101	99
149	JATI AUS	AWD276-JATI-AUS-FT80	34940	-	80	India	Yes		Admix	0.093798	0.088372	0	0.186033	0.631797	S179	674_LIB3867_LDI3386	12401864	24803728	2480.37	5.76831	101	94
150	KALINDI	AWD278-KALINDI-FT86	34964	-	86	India	Yes		4	0	0	0	1	0	S180	699_LIB4081_LDI3666	10133510	20267020	2026.7	4.71326	101	84
151	KALO BIRA	AWD279-KALO-BIRA-FT86	34966	-	86	India	Yes		1	0.961964	0	0	0.038036	0	S181	699_LIB4082_LDI3667	6426804	12853608	1285.36	2.98921	101	79
152	KELE BARI	AWD280-KELE-BARI-FT74	34984	-	74	India	Yes		Admix	0.604946	0.08185	0	0	0.313205	S182	830_LIB5655_LDI4979_TAGCTT_L002	3383979	6767958	1353.59	3.14789	101	99
153	KHASHIA PANJA	AWD281-KHASHIA-PANJA-FT86	34996	-	86	India	Yes		Admix	0.367402	0.169212	0	0.341873	0.121513	S183	699_LIB4083_LDI3668	12279035	24558070	2455.81	5.71118	101	79
154	KUBIL RASH	AWD282-KUBIL-RASH-FT80	35005	-	80	India	Yes		Admix	0.716908	0	0	0	0.283091	S184	674_LIB3868_LDI3387	6657257	13314514	1331.45	3.0964	99	79
155	M 136-20	AWD283-M-136-20-FT80	35053	-	80	India	Yes		Admix	0	0	0	0.675243	0.324757	S185	674_LIB3869_LDI3388	5159945	10319890	1031.99	2.39997	99	84
156	NAI DUMUR	AWD284-NAI-DUMUR-FT80	35057	-	80	India	Yes		Admix	0.754661	0.245338	0	0	0	S186	633_LIB3223_LDI2713	7408506	14817012	1481.7	3.44582	101	101
157	PADMA SAIL	AWD286-PADMA-SAIL-FT80	35079	-	80	India	Yes		5	0	0.037197	0	0.048799	0.914004	S187	699_LIB4084_LDI3669	6768639	13537278	1353.73	3.1482	101	79
158	SHAMLA MEGHI	AWD290-SHAMLA-MEGHI-FT80	35148	-	80	India	Yes		Admix	0.19801	0	0	0.029513	0.772477	S188	830_LIB5656_LDI4980_GGCTAC_L002	6436943	12873886	2574.78	5.98785	101	99
159	SHETE BHADO	AWD292-SHETE-BHADO-FT74	35152	-	74	India	Yes		Admix	0.57238	0.093661	0.009133	0.324825	0	S189	830_LIB5657_LDI4981_CTTGTA_L002	8907312	17814624	3562.92	8.28587	101	101
160	SOA MUKHI	AWD293-SOA-MUKHI-FT80	35158	-	80	India	Yes		Admix	0	0.154159	0	0.131948	0.713893	S190	699_LIB4085_LDI3670	10801274	21602548	2160.25	5.02385	101	79
161	SOASI	AWD294-SOASI-FT80	35159	-	80	India	Yes		Admix	0.737394	0.160795	0	0.054054	0.047757	S191	674_LIB3870_LDI3389	3866654	7733308	773.331	1.79844	101	99
162	SXC290	AWD295-SXC290-FT80	35181	-	80	India	Yes		Admix	0	0.22499	0	0.527887	0.247122	S192	699_LIB4086_LDI3671	4176958	8353916	835.392	1.94277	101	74
163	HABIGANJ BORO 2	AWD297-HABIGANJ-BORO-2-FT80	36827	-	80	Bangladesh	Yes		Admix	0.129432	0.289163	0	0	0.581405	S193	830_LIB4087_LDI4990_ATCACG_L003	3413920	6827840	1365.57	3.17574	101	101
164	SORIBHOG	AWD298-SORIBHOG-FT80	37312	-	80	Bangladesh	Yes		2	0	0.827259	0	0	0.172741	S194	830_LIB4088_LDI4991_CGATGT_L003	6626534	13253068	2650.61	6.16422	101	101
165	DESHI BORO	AWD299-DESHI-BORO-FT86	37411	-	86	Bangladesh	Yes		3	0	0	1	0	0	S195	830_LIB4089_LDI4992_TTAGGC_L003	6861419	13722838	2744.57	6.38272	101	101
166	JAGLE BORO	AWD300-JAGLE-BORO-FT80	37452	-	80	Bangladesh	Yes		3	0	0	0.967176	0.032824	0	S196	674_LIB3871_LDI3390	13018149	26036298	2603.63	6.05495	101	99
167	SORISHAFUL	AWD301-SORISHAFUL-FT80	37600	-	80	Bangladesh	Yes		Admix	0.674601	0	0	0	0.325399	S197	830_LIB5658_LDI4982_AGTCAA_L002	5653368	11306736	2261.35	5.25895	101	101
168	KADA-176-12	AWD305-KADA-176-12-FT80	40636	-	80	India	Yes		4	0	0.064853	0.052444	0.882702	0	S198	830_LIB5659_LDI4983_AGTTCC_L002	8778376	17556752	3511.35	8.16593	101	101
169	DHALAI KACHARI	AWD307-DHALAI-KACHARI-FT80	43811	-	80	Bangladesh	Yes		Admix	0.065126	0.574927	0	0	0.359947	S199	830_LIB4090_LDI4993_TGACCA_L003	4575384	9150768	1830.15	4.25617	101	101
170	GOTA LEMMA	AWD309-GOTA-LEMMA-FT86	43842	-	86	Bangladesh	Yes		Admix	0.579387	0.03403	0	0.004214	0.382368	S200	674_LIB3872_LDI3391	7913818	15827636	1582.76	3.68085	101	99
171	MOTZHUL	AWD310-MOTZHUL-FT80	43928	-	80	Bangladesh	No	Not enough plants from Nursurey in Mymensingh 2013							S201	830_LIB4091_LDI4994_ACAGTG_L003	13202175	26404350	5280.87	12.2811	101	101
172	CN2-175-5-31	AWD313-CN2-175-5-31-FT80	45363	-	80	India	Yes		Admix	0.228802	0.116273	0	0.184677	0.470248	S202	830_LIB4092_LDI4995_GCCAAT_L003	4347282	8694564	1738.91	4.04398	101	99
173	DHINGHA	AWD316-DHINGHA-FT80	45540	-	80	India	Yes		Admix	0.780776	0	0	0	0.219224	S203	830_LIB4093_LDI4996_CAGATC_L003	6271622	12543244	2508.65	5.83407	101	101
174	DA2	AWD317-DA2-FT80	45625	-	80	India	Yes		3	0	0	1	0	0	S204	830_LIB4094_LDI4997_ACTTGA_L003	4202892	8405784	1681.16	3.90967	101	99
175	GOUERISAIL	AWD321-GOUERISAIL-FT80	45720	-	80	India	Yes		Admix	0	0.360889	0	0.085978	0.553133	S205	830_LIB4095_LDI4998_GATCAG_L003	7537780	15075560	3015.11	7.01189	99	99
176	Code No BI 93	AWD322-BI93-FT91	45849	-	91	India	Yes		Admix	0	0.491814	0.046941	0.236371	0.224874	S206	674_LIB3873_LDI3392	11033669	22067338	2206.73	5.13194	101	99
177	KALI AUS	AWD325-KALI-AUS-FT83	45992	-	83	India	Yes		4	0	0	0.022422	0.977578	0	S207	830_LIB4096_LDI4999_TAGCTT_L003	4215273	8430546	1686.11	3.92118	101	99
178	PARBATJIRA	AWD329-PARBATJIRA-FT86	46517	-	86	India	Yes		Admix	0.72595	0	0	0	0.27405	S208	674_LIB3874_LDI3393	9244220	18488440	1848.84	4.29964	101	99
179	SATHA	AWD331-SATHA-FT80	46658	-	80	India	Yes		Admix	0.08259	0.003684	0	0.340343	0.573383	S209	633_LIB3224_LDI2714	7126173	14252346	1425.23	3.3145	101	101
180	DULAAUS	AWD338-DULAAUS-FT86	49180	-	86	Bangladesh	Yes		4	0	0	0	1	0	S210	830_LIB5660_LDI4984_ATGTCA_L002	9889543	19779086	3955.82	9.19957	101	101
181	CHINGER	AWD342-CHINGER-FT86	52107	-	86	India	Yes		4	0	0.00191	0.087875	0.888844	0.021372	S211	830_LIB5661_LDI4985_CCGTCC_L002	15168781	30337562	6067.51	14.1105	101	101
182	RAJBHOG	AWD347-RAJBHOG-FT80	52738	-	80	India	Yes		Admix	0	0.540555	0	0.163322	0.296123	S212	830_LIB4097_LDI5000_GGCTAC_L003	5039212	10078424	2015.68	4.68764	101	101
183	T 65	AWD348---FT80	52773	-	80	India	Yes		Admix	0.074074	0.395941	0	0.293027	0.236958	S213	830_LIB4098_LDI5001_CTTGTA_L003	4686454	9372908	1874.58	4.35949	101	99
184	SAITA BORO	AWD350-SAITA-BORO-FT86	53572	-	86	Bangladesh	Yes		3	0	0	1	0	0	S214	830_LIB5662_LDI4986_GTCCGC_L002	8149167	16298334	3259.67	7.58062	101	101
185	KUDA	AWD354-KUDA-FT86	54077	-	85	India	Yes		4	0	0.023228	0.055139	0.921632	0	S215	830_LIB5663_LDI4987_GTGAAA_L002	6702725	13405450	2681.09	6.23509	101	101
186	JABAR SAIL	AWD358-JABAR-SAIL-FT80	58738	-	80	Bangladesh	Yes		Admix	0.069038	0.575385	0	0	0.355577	S216	633_LIB3225_LDI2715	12921903	25843806	2584.38	6.01019	101	101
187	KALASU	AWD363-KALASU-FT86	60966	-	86	India	Yes		4	0	0	0.031503	0.968497	0	S217	633_LIB3226_LDI2716	8086832	16173664	1617.37	3.76132	101	101
188	JABOR SAIL	AWD367-JABOR-SAIL-FT80	66797	-	80	Bangladesh	Yes		Admix	0.085399	0.57954	0	0.064323	0.270737	S218	633_LIB3227_LDI2717	8666437	17332874	1733.29	4.0309	101	101
189	DUBHI GORA	AWD368-DUBHI-GORA-FT80	74567	-	80	India	Yes		Admix	0.21761	0.343017	0.02266	0.202724	0.21399	S219	830_LIB5664_LDI4988_GTGGCC_L002	7785395	15570790	3114.16	7.24223	101	101
190	NAGRI	AWD369-NAGRI-FT86	74767	-	86	India	Yes		Admix	0	0.382556	0.077067	0.343947	0.19643	S220	830_LIB5665_LDI4989_GTTTCG_L002	11681919	23363838	4672.77	10.8669	101	101
191	DJ29	AWD370-DJ29-FT80	76316	-	80	India	Yes		Admix	0.768104	0	0	0.231896	0	S221	830_LIB5672_LDI5089_ATCACG_L004	12149965	24299930	4859.99	11.3023	99	99
192	CHENGRI 1	AWD371-CHENGRI-1-FT80	77227	-	80	Bangladesh	Yes		4	0	0	0	1	0	S222	674_LIB3875_LDI3394	12684458	25368916	2536.89	5.89975	101	99
193	LALI BORO	AWD372-LALI-BORO-FT86	78395	-	86	Bangladesh	Yes		Admix	0	0.299378	0.607147	0.093475	0	S223	830_LIB5673_LDI5090_CGATGT_L004	24203817	48407634	9681.53	22.5152	99	99
194	JABAHUL	AWD386-JABAHUL-FT80	86978	-	80	Bangladesh	Yes		1	0.995259	0	0	0.004741	0	S224	674_LIB3876_LDI3395	12625278	25250556	2525.06	5.87222	99	89
195	RAJ MUNDO	AWD388-RAJ-MUNDO-FT80	87010	-	80	Bangladesh	Yes		1	0.858405	0	0	0	0.141595	S225	674_LIB3877_LDI3396	15119202	30238404	3023.84	7.03219	99	89
196	TEPA BORO 508	AWD395-TEPA-BORO-508-FT91	46739	-	91	India	Yes		Admix	0	0.410284	0.250999	0.338718	0	S226	830_LIB5674_LDI5091_TTAGGC_L004	7674680	15349360	3069.87	7.13924	99	99
197	W 418	AWD396-W-418-FT80	46788	-	80	India	Yes		Admix	0	0.328933	0.095329	0.520666	0.055072	S227	830_LIB5675_LDI5092_TGACCA_L004	7359570	14719140	2943.83	6.84611	99	99
198	WHITE DUBHI	AWD397-WHITE-DUBHI-FT80	66911	-	80	India	Yes		4	0	0	0	1	0	S228	830_LIB5676_LDI5093_ACAGTG_L004	8172074	16344148	3268.83	7.60193	99	99
199	ARC 7229	RHM6-ARC-7229-FTUK	-	301006	UK	India	Yes		2	0	1	0	0	0	S250	830_LIB5679_LDI5096_ACTTGA_L004	5271789	10543578	2108.72	4.90399	99	99
200	BJ 1	RHM18-BJ-1-FTUK	-	301016	UK	India	Yes		Admix	0	0	0.765728	0.234271	0	S251	830_LIB5680_LDI5097_GATCAG_L004	5441881	10883762	2176.75	5.06221	99	99
201	Black Gora	RHM19-BLACK-GORA-FTUK	-	301017	UK	India	Yes		Admix	0.229594	0.220707	0.021523	0.173845	0.354331	S252	830_LIB5681_LDI5098_TAGCTT_L004	3325937	6651874	1330.37	3.09389	99	99
202	Dhala Shaitta	RHM44-DHALA-SHAITTA-FTUK	-	301041	UK	Bangladesh	Yes		Admix	0	0.711947	0	0	0.288052	S253	830_LIB5682_LDI5099_GGCTAC_L004	8599276	17198552	3439.71	7.99933	99	99
203	DV85	RHM49-DV85-FTUK	-	301045	UK	Bangladesh	Yes		Admix	0	0	0.313392	0.686608	0	S254	830_LIB5683_LDI5100_CTTGTA_L004	10469600	20939200	4187.84	9.73916	99	99
204	DZ78	RHM50-DZ78-FTUK	-	301046	UK	Bangladesh	Yes		Admix	0.715544	0	0	0	0.284456	S255	830_LIB5684_LDI5101_AGTCAA_L004	9800872	19601744	3920.35	9.11709	99	99
205	Jhona 349	RHM78-JHONA-349-FTUK	-	301071	UK	India	Yes		Admix	0	0.529638	0.073788	0.213554	0.183019	S256	830_LIB5685_LDI5102_AGTTCC_L004	9067940	18135880	3627.18	8.43529	99	99
206	Kalamkati	RHM81-KALAMKATI-FTUK	-	301074	UK	India	Yes		Admix	0.142993	0.522812	0	0	0.334195	S257	830_LIB5686_LDI5103_ATGTCA_L004	10723546	21447092	4289.42	9.97539	99	99
207	Kasalath	RHM85-KASALATH-FTUK	-	301077	UK	India	Yes		4	0	0.13674	0.050952	0.812308	0	S258	830_LIB5687_LDI5104_CCGTCC_L004	11698919	23397838	4679.57	10.8827	99	99
208	T 1	RHM152-T-1-FTUK	-	301143	UK	India	Yes		Admix	0	0.622022	0	0.092661	0.285317	S259	830_LIB5688_LDI5105_GTCCGC_L004	6081780	12163560	2432.71	5.65747	94	94
209	T26	RHM153-T26-FTUK	-	301144	UK	India	Yes		Admix	6e-06	0.581734	0	0	0.418259	S260	830_LIB5689_LDI5106_GTGAAA_L004	15553319	31106638	6221.33	14.4682	99	94
210	ARC 6578	RHM178-ARC-6578-FTUK	-	301169	UK	India	Yes		2	0	1	0	0	0	S261	830_LIB5690_LDI5107_GTGGCC_L004	6836989	13673978	2734.8	6.35999	94	94
211	CTG 1516	RHM314-CTG-1516-FTUK	-	301304	UK	Bangladesh	Yes		5	0	0	0	0	1	S262	830_LIB5691_LDI5108_GTTTCG_L004	9396919	18793838	3758.77	8.74132	99	94
212	DD 62	RHM316-DD-62-FTUK	-	301306	UK	Bangladesh	Yes		Admix	0.130162	0.288228	0	0	0.581609	S263	836_LIB5692_LDI5109_ATCACG_L004	3512477	7024954	1404.99	3.26742	101	101
213	DJ 123	RHM317-DJ-123-FTUK	-	301307	UK	Bangladesh	Yes		1	0.853018	0	0	0	0.146982	S264	836_LIB5693_LDI5110_CGATGT_L004	2134624	4269248	853.85	1.9857	101	101
214	DJ 24	RHM318-DJ-24-FTUK	-	301308	UK	Bangladesh	Yes		5	0	0	0	0	1	S265	836_LIB5694_LDI5111_TTAGGC_L004	2438708	4877416	975.483	2.26857	101	101
215	DM 43	RHM320-DM-43-FTUK	-	301310	UK	Bangladesh	Yes		Admix	0	0	0.362432	0.637568	0	S266	836_LIB5695_LDI5112_TGACCA_L004	3781007	7562014	1512.4	3.51722	101	101
216	DM 56	RHM321-DM-56-FTUK	-	301311	UK	Bangladesh	Yes		5	0.065843	0.090549	0	0	0.843607	S267	836_LIB5696_LDI5113_ACAGTG_L004	2244913	4489826	897.965	2.08829	101	101
217	DM 59	RHM322-DM-59-FTUK	-	301312	UK	Bangladesh	Yes		5	0	0	0	0	1	S268	836_LIB5697_LDI5114_GCCAAT_L004	2432442	4864884	972.977	2.26274	101	101
218	DNJ 140	RHM323-DNJ-140-FTUK	-	301313	UK	Bangladesh	No	Very low sequence depth (0.42x)							S269	836_LIB5698_LDI5115_CAGATC_L004	451785	903570	180.714	0.420265	94	101
219	DV 123	RHM324-DV-123-FTUK	-	301314	UK	Bangladesh	Yes		5	0.060016	0.048094	0	0	0.89189	S270	836_LIB5699_LDI5116_ACTTGA_L004	2303174	4606348	921.27	2.14249	101	101
220	Ghorbhai	RHM326-Ghorbhai-FTUK	-	301316	UK	Bangladesh	Yes		Admix	0	0.631729	0	0	0.368271	S271	836_LIB5700_LDI5117_GATCAG_L004	4558338	9116676	1823.34	4.24031	101	101
221	Goria	RHM327-Goria-FTUK	-	301317	UK	Bangladesh	Yes		Admix	0.745946	0	0	0.254054	0	S272	836_LIB5701_LDI5118_TAGCTT_L004	5044089	10088178	2017.64	4.69218	101	101
222	Jamir	RHM328-Jamir-FTUK	-	301318	UK	Bangladesh	Yes		3	0	0	0.885299	0.114701	0	S273	836_LIB5702_LDI5119_GGCTAC_L004	2879752	5759504	1151.9	2.67884	101	101
223	Kachilon	RHM329-Kachilon-FTUK	-	301319	UK	Bangladesh	Yes		1	0.977589	0	0	0.022411	0	S274	836_LIB5703_LDI5120_CTTGTA_L004	6477240	12954480	2590.9	6.02534	101	101
224	DZ 193	RHM345-DZ-193-FTUK	-	301335	UK	Bangladesh	No	Very low sequence depth (1.86x)							S275	836_LIB5704_LDI5121_AGTCAA_L004	2003344	4006688	801.338	1.86358	101	101
225	Karkati 87	RHM346-KARKATI-87-FTUK	-	301336	UK	Bangladesh	Yes		Admix	0	0.528333	0.073924	0.213395	0.184348	S276	836_LIB5705_LDI5122_AGTTCC_L004	3657194	7314388	1462.88	3.40204	101	101
226	ARC 10376	RHM353-ARC-10376-FTUK	-	301341	UK	India	Yes		1	0.836219	0.163781	0	0	0	S277	836_LIB5706_LDI5123_ATGTCA_L004	2195741	4391482	878.296	2.04255	101	101
227	9524	RHM357-9524-FTUK	-	301345	UK	India	Yes		2	0	0.918004	0.081996	0	0	S278	836_LIB5707_LDI5124_CCGTCC_L004	2602183	5204366	1040.87	2.42064	101	101
228	Surjamkuhi	RHM359-SURJAMKUHI-FTUK	-	301347	UK	India	Yes		5	0	0	0	0	1	S279	836_LIB5708_LDI5125_GTCCGC_L004	2512558	5025116	1005.02	2.33726	101	101
229	PTB 30	RHM360-PTB.30-FTUK	-	301348	UK	India	Yes		Admix	0	0.201998	0	0	0.798002	S280	836_LIB5709_LDI5126_GTGAAA_L004	2088486	4176972	835.394	1.94278	101	101
230	Bawoi	RAF1-Bawoi-FT80	-	-	80	Bangladesh	Yes		Admix	0.557237	0	0.442763	0	0	S1	830_LIB5606_LDI4930_ATCACG_L005	17633064	35266128	7053.23	16.4029	101	101
231	Lakhai	RAF2-Lakhai-FT80	-	-	80	Bangladesh	No	Japonica							S2	830_LIB5607_LDI4931_CGATGT_L005	2360781	4721562	944.312	2.19608	101	101
232	Boraya	RAF3-Boraya-FT80	-	-	80	Bangladesh	No	Japonica							S3	633_LIB3208_LDI2698	12224207	24448414	2444.84	5.68568	101	101
233	Bogura	RAF4-Bogura-FT77	-	-	77	Bangladesh	Yes		3	0	0	1	0	0	S4	830_LIB5608_LDI4932_TTAGGC_L005	9996604	19993208	3998.64	9.29917	101	101
234	Lahaya	RAF5-Lahaya-FT80	-	-	80	Bangladesh	No	Japonica							S5	830_LIB5609_LDI4933_TGACCA_L005	2645506	5291012	1058.2	2.46094	101	101
235	Deshi boro	RAF6-Deshi.boro-FT80	-	-	80	Bangladesh	No	Indica							S6	830_LIB5610_LDI4934_ACAGTG_L005	9642318	19284636	3856.93	8.9696	101	101
236	Tupa	RAF7-Tupa-FT80	-	-	80	Bangladesh	Yes		3	0	0	1	0	0	S7	699_LIB4027_LDI3612	7180604	14361208	1436.12	3.33982	101	89
237	Chhola boro	RAF8-Chhola.boro-FT82	-	-	82	Bangladesh	Yes		3	0	0	1	0	0	S8	633_LIB3209_LDI2699	12704693	25409386	2540.94	5.90916	101	101
238	Chhola boro(2)	RAF9-Chhola.boro.2-FT82	-	-	82	Bangladesh	Yes		3	0	0	1	0	0	S9	699_LIB4028_LDI3613	15032163	30064326	3006.43	6.9917	101	89
239	Lafai	RAF11-Lafai-FT82	-	-	82	Bangladesh	Yes		3	0	0	1	0	0	S10	830_LIB5611_LDI4935_GCCAAT_L005	8990936	17981872	3596.37	8.36366	99	99
240	Omni boro	RAF12-Omni.boro-FT85	-	-	85	Bangladesh	No	Not enough plants from Nursurey in Mymensingh 2013	3	0	0	1	0	0	S11	830_LIB5612_LDI4936_CAGATC_L005	4131914	8263828	1652.77	3.84364	101	99
241	Chaili boroi	RAF13-Chaili.boroi-FT80	-	-	80	Bangladesh	Yes		3	0	0	1	0	0	S12	830_LIB5613_LDI4937_ACTTGA_L005	6360290	12720580	2544.12	5.91655	99	94
242	Sada boro	RAF15-Sada.boro-FT80	-	-	80	Bangladesh	Yes		3	0	0	1	0	0	S13	633_LIB3210_LDI2700	11630389	23260778	2326.08	5.40948	101	101
243	Gobir sail	RAF17-Gobir.sail-FT82	-	-	82	Bangladesh	No	Japonica							S14	699_LIB4029_LDI3614	5459908	10919816	1091.98	2.53949	101	89
244	Dumsia 81	RAF18-Dumsia.81-FT85	-	-	85	Bangladesh	No	Japonica							S15	699_LIB4030_LDI3615	9165829	18331658	1833.17	4.26318	101	89
245	Tulsi boro	RAF19-Tulsi.boro-FT80	-	-	80	Bangladesh	Yes		3	0	0	1	0	0	S16	674_LIB3807_LDI3323	7718661	15437322	1543.73	3.59007	99	84
246	Gachi	RAF20-Gachi-FT80	-	-	80	Bangladesh	No	Japonica- No DNA sent from IRRI
247	Gul tepi	RAF22-Gul.tepi-FT85	-	-	85	Bangladesh	No	Japonica							S17	699_LIB4031_LDI3616	15366035	30732070	3073.21	7.14699	101	89
248	Rata boro	RAF23-Rata.boro-FT80	-	-	80	Bangladesh	Yes		3	0	0	1	0	0	S18	674_LIB3808_LDI3324	7780987	15561974	1556.2	3.61906	101	99
249	Choudhury sail	RAF25-Choudhury.sail-FT90	-	-	90	Bangladesh	No	Very low sequence depth (0.83x)							S229	674_LIB3878_LDI3397	1785996	3571992	357.199	0.830696	99	89
250	Bachi boro	RAF26-Bachi.boro-FT80	-	-	80	Bangladesh	No	Japonica							S19	699_LIB4032_LDI3617	3552862	7105724	710.572	1.65249	101	84
251	Lara	RAF27-Lara-FT85	-	-	85	Bangladesh	No	Not enough plants from Nursurey in Mymensingh 2013	Admix	0	0.150501	0.55568	0.293819	0	S20	699_LIB4033_LDI3618	7931025	15862050	1586.2	3.68885	101	84
252	Asahi	RAF28-Asahi-FT80	-	-	80	Bangladesh	No	Indica							S21	674_LIB3809_LDI3325	7672974	15345948	1534.59	3.56883	101	94
253	BR 3	RAF29-BR.3-FT87	-	-	87	Bangladesh	No	Indica							S22	674_LIB3810_LDI3326	7542723	15085446	1508.54	3.50824	101	99
254	BR 6	RAF30-BR.6-FT80	-	-	80	Bangladesh	No	Indica							S23	699_LIB4034_LDI3619	4290288	8580576	858.058	1.99548	101	84
255	BR 16	RAF31-BR.16-FT85	-	-	85	Bangladesh	Yes		Admix	0	0.576998	0.038478	0.384523	0	S24	674_LIB3811_LDI3327	7092310	14184620	1418.46	3.29875	101	99
256	BRRI dhan 28	RAF32-BRRI.dhan.28-FT80	-	-	80	Bangladesh	No	Indica							S25	674_LIB3812_LDI3328	10511975	21023950	2102.39	4.88929	101	94
256	BRRI dhan 28	RAF32-BRRI.dhan.28-FT80					No	Indica							S25	836_LIB6193_LDI5129_CGTACG_L005	5029068	10058136	2011.63	4.6782	101	101
257	BRRI dhan45	RAF34-BRRI.dhan45-FT80	-	-	80	Bangladesh	No	Indica							S26	674_LIB3813_LDI3329	14400671	28801342	2880.13	6.69799	99	99
258	BRRI dhan47	RAF35-BRRI.dhan47-FT82	-	-	82	Bangladesh	No	Indica							S27	674_LIB3814_LDI3330	11528803	23057606	2305.76	5.36223	99	89
259	BRRI dhan50	RAF36-BRRI.dhan50-FT81	-	-	81	Bangladesh	No	Indica							S28	674_LIB3815_LDI3331	10082728	20165456	2016.55	4.68964	101	99
260	BINA dhan 5	RAF37-BINA.dhan.5-FT83	-	-	83	Bangladesh	No	Indica							S29	699_LIB4035_LDI3620	14940240	29880480	2988.05	6.94895	101	84
261	Iratom 24	RAF40-Iratom.24-FT85	-	-	85	Bangladesh	No	Indica							S30	674_LIB3816_LDI3332	15156503	30313006	3031.3	7.04954	89	74
262	IARI 6626	USA2-IARI.6626-FT85	-	310317	85	India	No	Very low sequence depth (1.37x)							S231	830_LIB5677_LDI5094_GCCAAT_L004	1469370	2938740	587.748	1.36686	99	99
263	IARI 7449	USA3-IARI.7449-FT80	-	310318	80	India	Yes		2	0	1	0	0	0	S232	830_LIB4099_LDI5002_AGTCAA_L003	9503487	19006974	3801.39	8.84045	101	101
264	Purple Puttu	USA4-Purple.Puttu-FT85	-	310364	85	India	No	Not enough plants from Nursurey in Mymensingh 2013	2	0	0.803451	0	0.141463	0.055086	S233	830_LIB4100_LDI5003_AGTTCC_L003	5555157	11110314	2222.06	5.16759	101	101
265	P 79	USA5-P.79-FT77	-	310380	77	India	Yes		Admix	0	0.489519	0.035459	0.211562	0.263459	S234	674_LIB3879_LDI3398	10405082	20810164	2081.02	4.83957	101	99
266	Polman	USA6-Palman-FT75	-	310388	75	India	Yes		Admix	0	0.650778	0	0.091394	0.257827	S235	830_LIB4101_LDI5004_ATGTCA_L003	5706472	11412944	2282.59	5.30835	101	101
267	DJ 53	USA7-DJ.53-FT79	-	310513	79	Bangladesh	Yes		5	0	0	0	0	1	S236	674_LIB3880_LDI3399	4511444	9022888	902.289	2.09835	101	99
268	Ziri	USA9-Ziri-FT80	-	310787	80	India	Yes		Admix	0.046576	0.534788	0.044214	0.097091	0.277331	S237	830_LIB5666_LDI5005_CCGTCC_L003	3079819	6159638	1231.93	2.86495	101	101
269	IARI 6621	USA10-IARI.6621-FT77	-	311046	77	India	Yes		2	0	1	0	0	0	S238	830_LIB4103_LDI5006_GTCCGC_L003	10368404	20736808	4147.36	9.64503	101	101
270	P 32	USA11-P.32-FT81	-	311085	81	India	Yes		Admix	0	0.643668	0	0.321582	0.034749	S239	830_LIB4104_LDI5007_GTGAAA_L003	39983312	79966624	15993.3	37.1938	101	101
271	99216	USA12-99216-FT77	-	311111	77	India	Yes		2	0	0.999756	0	0	0.000244	S240	830_LIB5678_LDI5095_CAGATC_L004	8233544	16467088	3293.42	7.65911	99	99
272	NP 97	USA13-NP.97-FT75	-	311207	75	India	Yes		Admix	0	0.659332	0	0.106519	0.234149	S241	830_LIB4105_LDI5008_GTGGCC_L003	17300054	34600108	6920.02	16.0931	101	101
273	DV 118	USA19-DV.118-FT75	-	311579	75	Bangladesh	Yes		5	0	0	0	0	1	S242	674_LIB3881_LDI3400	22346570	44693140	4469.31	10.3938	99	89
274	Pachodi 427	USA20-Pachodi.427-FT80	-	311589	80	India	Yes		Admix	0	0	0.230176	0.769824	0	S243	674_LIB3882_LDI3401	5720501	11441002	1144.1	2.6607	101	99
275	Bowalia	USA21-Bowalia-FT77	-	311608	77	Bangladesh	Yes		Admix	0.433228	0	0.558585	0.008188	0	S244	674_LIB3883_LDI3402	5772471	11544942	1154.49	2.68487	101	94
276	ARC 10303	USA22-ARC.10303-FT75	-	311639	75	India	No	Not enough plants from Nursurey in Mymensingh 2013	1	0.822934	0	0	0	0.177066	S245	674_LIB3884_LDI3403	17478731	34957462	3495.75	8.12964	101	94
277	ARC 10378	USA23-ARC.10378-FT74	-	311640	74	India	No	No DNA sent from IRRI
278	DA 24	USA25-DA.24-FT75	-	311665	75	Bangladesh	Yes		Admix	0.442594	0	0	0	0.557406	S247	674_LIB3885_LDI3404	3546884	7093768	709.377	1.64971	101	99
279	Thubri	USA26-Thubri-FT74	-	311683	74	Bangladesh	Yes		Admix	0.656036	0.143292	0	0.026412	0.174259	S248	674_LIB3886_LDI3405	7269807	14539614	1453.96	3.38131	101	94
280	Fulbadam	USA27-Fulbadam-FT77	-	311784	77	Bangladesh	Yes		Admix	0.794366	0	0	0.205634	0	S249	830_LIB5667_LDI5009_GTTTCG_L003	8554545	17109090	3421.82	7.95772	101	101
281	AZUCENA	AWD399-AZUCENA-FTUK	117264	-	Uk	Philippines	No	Japonica							S281	836_LIB5710_LDI5127_GTGGCC_L004	4436139	8872278	1774.46	4.12664	101	101
282	DOM SUFID	AWD400-DOM-SUFID-FT86	117265	-	86	Iran	No	Japonica							S282	836_LIB5711_LDI5128_GTTTCG_L004	3104724	6209448	1241.89	2.88812	101	101
283	DULAR	AWD401-DULAR-FT80	117266	-	80	India	Yes		Admix	0	0	0	0.282239	0.717761	S283	836_LIB5712_LDI5130_ATCACG_L005	3821241	7642482	1528.5	3.55464	101	101
284	FR 13 A	AWD402-FR-13-A-FTUK	117267	-	Uk	India	Yes		4	0	0	0.179395	0.820605	0	S284	836_LIB5713_LDI5131_CGATGT_L005	6442702	12885404	2577.08	5.99321	101	101
285	IR 64-21	AWD403-IR-64-21-FTUK	117268	-	Uk	Philippines	No	Indica							S285	836_LIB5714_LDI5132_TTAGGC_L005	3814634	7629268	1525.85	3.5485	101	101
286	LI-JIANG-XIN-TUAN-HEI-GU	AWD404-LI-JIANG-XIN-TUAN-HEI-GU-FTUK	117269	-	Uk	China	No	Japonica							S286	836_LIB5715_LDI5133_TGACCA_L005	7666712	15333424	3066.68	7.13183	101	101
287	M 202	AWD405-M-202-FTUK	117270	-	Uk	USA	No	Japonica							S287	836_LIB5716_LDI5134_ACAGTG_L005	2507663	5015326	1003.07	2.33271	101	101
288	MINGHUI 63	AWD406-MINGHUI-63-FTUK	117271	-	Uk	China	Yes		Admix	0	0.559062	0.033495	0.407443	0	S288	836_LIB5717_LDI5135_GCCAAT_L005	6924109	13848218	2769.64	6.44103	101	101
289	MOROBEREKAN	AWD407-MOROBEREKAN-FTUK	117272	-	Uk	Guinea	No	Japonica							S289	836_LIB5718_LDI5136_CAGATC_L005	3955705	7911410	1582.28	3.67973	101	101
290	N 22	AWD408-N-22-FTUK	117273	-	Uk	India	Yes		Admix	0	0.541736	0	0.165214	0.29305	S290	836_LIB5719_LDI5137_ACTTGA_L005	5540184	11080368	2216.07	5.15366	101	101
291	NIPPONBARE	AWD409-NIPPONBARE-FTUK	117274	-	Uk	Japan	No	Japonica							S291	836_LIB5720_LDI5138_GATCAG_L005	9909782	19819564	3963.91	9.2184	101	101
292	POKKALI	AWD410-POKKALI-FTUK	117275	-	Uk	India	No	Indica							S292	836_LIB5721_LDI5139_TAGCTT_L005	5566628	11133256	2226.65	5.17826	101	101
293	SADU CHO	AWD411-SADU.CHO-FTUK	117276	-	Uk	Korea	No	Indica							S293	836_LIB5722_LDI5140_GGCTAC_L005	5074544	10149088	2029.82	4.72051	101	101
294	SANHUANGZHAN NO 2	AWD412-SANHUANGZHAN.NO.2-FTUK	117277	-	Uk	China	No	Indica							S294	836_LIB5723_LDI5141_CTTGTA_L005	9454564	18909128	3781.83	8.79494	101	101
295	SWARNA	AWD413-SWARNA-FTUK	117278	-	Uk	India	No	Indica							S295	836_LIB5724_LDI5142_AGTCAA_L005	10670976	21341952	4268.39	9.92649	101	101
296	TAINUNG 67	AWD414-TAINUNG.67-FTUK	117279	-	Uk	Taiwan	No	Japonica							S296	836_LIB5725_LDI5143_AGTTCC_L005	1758583	3517166	703.433	1.63589	101	101
297	ZHENSHAN 97 B	AWD415-ZHENSHAN.97.B-FTUK	117280	-	Uk	China	No	Indica							S297	836_LIB5726_LDI5144_ATGTCA_L005	3177070	6354140	1270.83	2.95541	101	101
298	ASWINA	AWD416-ASWINA-FT91	117281	-	91	BDG	No	Indica							S298	836_LIB5727_LDI5145_CCGTCC_L005	8730984	17461968	3492.39	8.12185	101	101
299	CYPRESS	AWD417-CYPRESS-FTUK	117282	-	Uk	USA	No	Japonica							S299	836_LIB5728_LDI5146_GTCCGC_L005	5876583	11753166	2350.63	5.46659	101	101
300	RAYADA	AWD418-RAYADA-FTUK	117283	-	Uk	Bangladesh	Yes		4	0	0.036438	0	0.963562	0	S300	836_LIB5729_LDI5147_GTGAAA_L005	10139379	20278758	4055.75	9.43198	101	101

## Sheet: Phenotype data
BAAP no.	cultivar name	Mn1_AWD_Grain	Mn1_CF_Grain	Mn1_AWD_Straw	Mn1_CF_Straw	Mn1_AWD_HI	Mn1_CF_HI	Mn1_AWD_FT	Mn1_CF_FT	Mn2_AWD_Grain	Mn2_CF_Grain	Mn2_AWD_Straw	Mn2_CF_Straw	Mn2_AWD_HI	Mn2_CF_HI	Mn2_AWD_FT	Mn2_CF_FT	Md2_AWD_Grain	Md2_CF_Grain	Md2_AWD_Straw	Md2_CF_Straw	Md2_AWD_HI	Md2_CF_HI
1	ASSAM 4(BORO)	101.33	70.7225	128.295	114.02	0.445451	0.386508	96	99	70.5	76	120.5	123	0.36336	0.383767	113	113	105.5	99.75	145	158.25	0.419	0.3872
2	ARC 5959	47.7725	46.8075	72.27	78.79	0.380212	0.37322	108	114	27.25	25.25	51.25	45.75	0.344002	0.357533	121	125	32.25	22	71	35.5	0.31203	0.3846
3	ARC 5960	111.188	48.32	133.52	86.1375	0.452645	0.352423	104	112	46.25	NA	50.25	NA	0.485077	NA	125	NA	33.75	20	53.5	32.75	0.3767	0.3605
4	ARC 5977	114.69	32.31	136.827	78.315	0.451452	0.26633	106	114	42.75	41	73.5	78.3333	0.357775	0.343081	121	119	32.25	33	58.8	60.75	0.3624	0.356
5	ARC 6000	64.0425	58.82	116.123	96.87	0.344346	0.354798	98	100	63.25	63.25	113.25	139	0.350205	0.307882	113	117	46	45.5	93.5	101.25	0.3331	0.30983
6	ARC 6240	109.61	60.085	126.285	100.188	0.463423	0.371368	99	102	71.5	46.25	88.25	83.25	0.441528	0.355792	113	113	89	58.8	111	85.3	0.438	0.40831
7	ARC 7325	87.07	41.0025	106.65	82.9175	0.448977	0.295824	98	100	60.5	54.25	88	79.25	0.405912	0.406387	112	111	82.75	76	96.5	105.25	0.4596	0.41988
8	ARC 10958	53.9275	40.305	68.825	62.025	0.437924	0.379248	97	98	47.75	15	68.75	46.6667	0.411388	0.232365	117	NA	NA	NA	NA	NA	NA	NA
9	AS 2	139.17	93.1567	163.195	147.68	0.45621	0.390044	104	NA	104	112.25	148.75	194.5	0.409557	0.365487	117	117	96.8	93.25	146.3	169.75	0.3988	0.353
10	ARC 10392	98.8275	68.25	105.64	114.49	0.484195	0.374594	96	100	64.5	45	72	83.75	0.469558	0.341745	110	117	66.75	63.3	86.5	80	0.438	0.4336
11	ARC 11205	74.8725	52.7775	89.12	81.86	0.45498	0.384562	104	100	39.25	NA	55.5	NA	0.414227	NA	119	117	36.25	44.8	53.8	67	0.4277	0.4057
12	ARC 11340	65.3825	47.88	114.642	99.3275	0.360294	0.324931	102	106	25.25	17	57	52.3333	0.294533	0.240642	117	119	48.75	36.5	80	71.8	0.3703	0.3428
13	ARC 11600	107.465	74.6175	129.77	103.597	0.452845	0.414386	102	110	48	51	78.75	84	0.380762	0.377549	119	119	56.25	55	105.5	90.75	0.3487	0.3769
14	AUS MURALI	56.665	23.9025	98.03	58.8575	0.341507	0.278818	98	100	45	47.5	79	129.75	0.357874	0.265352	110	115	57.25	50	108	101.75	0.3458	0.3267
15	BOWALIA	66.57	44.2925	102.772	70.9325	0.390748	0.386571	97	97	34.75	43.5	66	94.75	0.338909	0.313685	107	113	66.3	51	98	96	0.3937	0.3441
16	BOWALIA 2	72.0725	32.63	69.925	53.345	0.509871	0.386301	98	100	37.25	33.25	48.5	52.75	0.420409	0.378318	110	115	54.5	53	69	74.75	0.4312	0.4123
17	AUS 12	94.175	63.1125	108.91	95.165	0.460523	0.417564	102	100	34.25	16	70.75	62.25	0.320795	0.199345	113	117	76.5	32.75	122	64.5	0.3878	0.3212
18	AUS 16	79.5025	57.7525	117.237	100.513	0.40292	0.339943	102	110	31.5	20	67.25	67.5	0.260613	0.221529	115	119	49	37.75	72.25	65.5	0.4067	0.3584
19	AUS 22	87.6775	70.5675	129.593	116.515	0.400132	0.374391	104	110	26.5	33	66.5	65.6667	0.288463	0.301331	121	121	38	23.33	77	56.33	0.3324	0.2912
20	AUS 28	NA	NA	NA	NA	NA	NA	NA	NA	NA	NA	NA	NA	NA	NA	NA	NA	NA	NA	NA	NA	NA	NA
21	AUS 29	80.41	84.9225	96.61	140.482	0.454926	0.373456	106	106	41	36.5	78.25	68	0.344802	0.342126	121	119	51	47	71.25	67.75	0.4197	0.4146
22	AUS 31	89.0375	71.995	133.085	161.968	0.391376	0.31363	102	100	50.25	53	91.25	99.6667	0.343343	0.34749	121	115	57.5	53.75	88.5	113.5	0.3902	0.3223
23	AUS 37	81.1225	81.405	96.675	108.918	0.450773	0.418796	100	100	56.75	NA	66.75	NA	0.453748	NA	117	115	55.5	50.5	79	74.5	0.399	0.4012
24	AUS 46	82.095	66.1325	96.7925	98.855	0.456741	0.387346	104	106	24.5	25.75	47.5	52.25	0.327006	0.325452	119	117	59.75	37.67	82.75	95	0.4185	0.2736
25	AUS 60	88.125	76.8475	88.2275	101.278	0.50119	0.42653	97	99	52.25	17.5	60.75	46	0.459022	0.214758	115	117	56.5	57.75	85.5	78.5	0.3869	0.42323
26	AUS 62	70	54.61	146.19	128.675	0.346994	0.305556	99	99	37.3333	26	77.3333	76	0.332846	0.237236	115	113	57.67	42.75	143	120.3	0.2873	0.2621
27	AUS 63	52.4325	36.75	70.905	71.2625	0.407525	0.327977	104	104	23.75	14.25	51.5	33	0.302831	0.298632	121	121	42.75	31.5	68.3	65.75	0.397	0.3219
28	AUS 67	82.35	54.1425	104.103	76.08	0.44075	0.412905	99	102	43.75	31	86.75	68	0.338564	0.313987	119	117	56.25	41.25	93.8	66.25	0.3794	0.3833
29	AUS 68	75.22	72.535	98.6325	103.96	0.436575	0.388266	104	104	43	35.3333	92.6667	75.6667	0.300233	0.324588	121	115	69.5	43.75	109	87.3	0.3867	0.3407
30	AUS 74	87.57	70.985	109.838	119.76	0.446392	0.368537	99	100	70	45.75	109.75	94.5	0.393726	0.323953	117	117	48.8	40.75	71.5	63	0.3956	0.3972
31	AUS 77	66.545	41.325	75.1425	62.2575	0.469874	0.405274	99	99	36.75	29.25	52.75	65.25	0.404552	0.307706	113	115	53	54.75	67	83.5	0.439	0.3921
32	AUS 89	72.7425	42.8425	122.543	66.67	0.373215	0.381606	106	102	22.5	32.25	49.75	68	0.316672	0.314107	121	121	50.5	38.5	76.25	64.75	0.4002	0.3642
33	AUS 93	81.675	57.3675	95.445	89.0175	0.460638	0.387802	104	104	44	28.6667	62.75	64	0.403489	0.300722	121	117	60.5	48.25	75	74.3	0.4458	0.4
34	AUS 96	65.9225	41.77	103.748	92.3167	0.376591	0.312584	97	98	46.5	29.75	70.5	76.25	0.394816	0.28226	110	113	49.8	37.75	97	74.5	0.3448	0.3472
35	AUS 99	48.515	NA	116.045	NA	0.30904	NA	98	102	31	24.5	73.25	68	0.276771	0.264348	113	113	45	37	66.5	75.25	0.3895	0.3324
36	AUS 100	38.1425	40.13	93.9325	91.555	0.273331	0.305232	97	99	41	35.5	86.75	78.75	0.319643	0.304965	113	115	NA	NA	NA	NA	NA	NA
37	AUS 105	44.23	60.1025	149.738	112.9	0.224536	0.342184	102	104	27.25	32.5	63	66	0.319828	0.340287	117	117	37.75	37.75	87	87	0.3004	0.3011
38	AUS 125	74.2375	50.855	105.612	105.11	0.414058	0.330188	99	99	46.5	43	84.5	86.3333	0.358009	0.32694	113	110	75.5	58.75	127.75	99.75	0.37136	0.3686
39	AUS 127	37.52	44.9175	140.215	131.06	0.193771	0.25273	102	106	28.75	23.25	71.25	101	0.290149	0.173085	117	119	NA	NA	NA	NA	NA	NA
40	AUS 130	68.1825	34.415	95.35	62	0.419924	0.367369	100	104	45.75	30	53.75	54.3333	0.431158	0.335237	117	115	43	45.5	60.5	74.5	0.4176	0.3658
41	AUS 131	84.2025	67.9175	98.0375	96.525	0.461236	0.408352	100	100	66	42	94	84	0.413996	0.324792	115	115	72.25	42.5	99.5	68.8	0.4249	0.3657
42	AUS 136	67.0775	36.465	83.345	68.7275	0.427469	0.346279	100	110	36	17	61.75	66.75	0.357403	0.192718	117	119	30	40.5	54	79.5	0.3586	0.3356
43	AUS 151	92.0625	93.445	111.062	136.542	0.45046	0.395323	98	99	54.5	50.25	74.25	94.25	0.429246	0.342372	113	115	50.25	60.5	77.75	110.5	0.3835	0.3505
44	AUS 152	109.088	56.07	125.22	92.2067	0.464755	0.363414	100	102	36.75	43.25	57.25	78	0.392704	0.354999	117	117	53.5	36.25	78.5	105.5	0.4061	0.2605
45	AUS 154	93.78	47.15	118.095	74.475	0.440556	0.346975	97	98	69.5	43	90.5	74.75	0.434619	0.355283	115	115	79.75	55	101.5	97	0.4403	0.3582
46	AUS 169	84.5075	61.5975	86.8375	90.47	0.489332	0.405206	99	106	43.5	46	67.5	81.75	0.395176	0.361266	111	113	42.75	49	52.75	71.3	0.4472	0.4047
47	AUS 175	83.2325	54.94	105.343	95.625	0.436647	0.34407	99	102	39.25	44.3333	75.25	74	0.329964	0.328464	113	111	49.75	54.5	93	127.3	0.3469	0.3002
48	AUS 180	53.1575	49.3233	58.67	69.2333	0.475308	0.416521	100	100	43	24.5	65.25	56.5	0.407671	0.3	121	115	42	37.5	68.5	62	0.3842	0.3755
49	AUS 204	70.0175	61.0625	112.375	90.4525	0.383773	0.403335	100	100	41.75	38.5	69.25	79.5	0.376564	0.32383	119	115	51	68.5	84	115.75	0.3857	0.3695
50	AUS 209	NA	NA	NA	NA	NA	NA	NA	NA	NA	NA	NA	NA	NA	NA	NA	NA	NA	NA	NA	NA	NA	NA
51	AUS 210	NA	NA	NA	NA	NA	NA	NA	NA	NA	NA	NA	NA	NA	NA	NA	NA	NA	NA	NA	NA	NA	NA
52	AUS 228	97.5375	80.7375	94.5875	99.1075	0.501348	0.442516	102	102	44.5	23	57.25	43.5	0.434323	0.343833	115	119	57.25	34.75	76	61.75	0.4261	0.3518
53	AUS 267	56.475	52.9325	90.4975	81.3975	0.376708	0.376459	98	99	50	36.75	73.75	77	0.409628	0.318909	108	110	48.75	57	82.5	107.5	0.3744	0.3396
54	AUS 268	94.975	67.4825	105.532	102.575	0.471962	0.398618	98	100	49.5	29.25	83.25	84.5	0.382181	0.242044	113	115	57.5	49.5	89.75	89.8	0.387	0.3553
55	AUS 273	83.515	54.28	99.1625	75.9675	0.454798	0.410604	104	100	50.75	24.75	68	45.75	0.43221	0.345805	115	115	54.5	58.25	69	93.75	0.4361	0.38248
56	AUS 277	92.1225	66.825	103.85	82.345	0.471042	0.44604	99	99	37.25	37.5	61.75	66.25	0.382785	0.359199	121	113	46.75	45.25	62	53.5	0.4251	0.46
57	AUS 280	65.95	42.4033	110.415	68.4567	0.395992	0.38017	104	106	26	38	50.25	59.3333	0.342555	0.356168	121	113	NA	NA	NA	NA	NA	NA
58	AUS 283	94.2375	68.5225	111.787	118.79	0.452851	0.365031	99	106	33.5	39	64	80.5	0.334962	0.326153	113	115	62.25	50.5	86.5	80.5	0.421	0.3842
59	AUS 293	62.5725	36.465	83.5	56.9875	0.41853	0.383613	97	98	46.5	28.25	77.75	71.75	0.37638	0.282261	111	113	47	34.5	64.8	71	0.4225	0.3269
60	AUS 294	69.6475	NA	89.345	NA	0.435593	NA	99	100	40.3333	46.5	73.3333	86	0.353473	0.34802	115	113	48	38	63.5	68.5	0.43337	0.348
61	AUS 298	NA	NA	NA	NA	NA	NA	NA	NA	NA	NA	NA	NA	NA	NA	NA	NA	NA	NA	NA	NA	NA	NA
62	AUS 309	140.648	99.5175	162.607	164.363	0.46428	0.376707	104	104	61.25	66.25	136	163	0.312155	0.286084	117	123	53	46	166.25	152.8	0.2431	0.2329
63	AUS 314	79.715	54.9275	111.938	117.052	0.415589	0.316338	106	106	27	22.25	46	40.75	0.3192	0.360492	119	121	51.75	43	78	77.75	0.3963	0.3495
64	AUS 317	105.285	62.805	112.61	103.115	0.453795	0.369913	99	102	47.25	28	77.75	78.75	0.391872	0.261244	117	117	55.5	58.5	93.5	93.5	0.36994	0.3809
65	AUS 321	74.6575	NA	115.15	NA	0.391908	NA	98	100	43.5	48	83.75	87.75	0.342437	0.356312	117	117	51.5	51.75	105.5	107	0.32662	0.3345
66	AUS 323	68.285	52.3375	107.365	92.81	0.371945	0.362784	102	100	43.75	25.75	73.25	58	0.37411	0.3187	113	117	53.8	36.5	103	64.3	0.3416	0.351
67	AUS 328	122.895	78.73	131.73	135.412	0.481412	0.365846	102	104	42	32.75	72.5	89	0.355294	0.269908	119	121	56	48.5	82	88.5	0.4068	0.3604
68	AUS 335	59.565	41.7175	87.57	94.995	0.39241	0.298945	99	102	37.5	49	69.5	69.75	0.350551	0.404494	117	117	37	36.5	66.8	65.8	0.3484	0.3512
69	AUS 350	68.6675	49.33	98.185	80.8025	0.400358	0.377128	99	98	44	39.25	88.75	82	0.320821	0.324824	115	117	54.75	51.25	89.5	96.5	0.37678	0.3468
70	AUS 353	107.71	87.5325	121.688	125.582	0.469778	0.409053	102	99	34.75	34.6667	56	85	0.392185	0.287522	119	NA	47	52.25	75.5	73	0.3884	0.4145
71	AUS 354	98.3325	83.9775	101.638	108.335	0.492083	0.432073	99	99	44.5	28.25	66.25	52	0.401029	0.331476	113	117	61	49.5	81.75	69	0.4314	0.42048
72	AUS 361	68.3075	55.4	119.332	96.78	0.364873	0.355498	99	100	49.25	33	73.75	87.25	0.405243	0.269355	113	115	41.25	42.75	74.75	85	0.3537	0.3416
73	AUS 362	65.1325	42.19	76.63	84.3375	0.461005	0.339504	98	100	44.75	22.3333	63.75	54.3333	0.416942	0.291152	113	117	40.25	41.75	71.5	74.75	0.358	0.358
74	AUS 364	78.98	55.35	119.025	98.2325	0.393602	0.345034	100	100	35.25	27.75	53	70	0.398542	0.281797	112	115	37.25	34.75	60.5	72	0.3766	0.333
75	AUS 366	88.5775	51.6575	89.655	80.8275	0.499868	0.381755	99	100	43	35	50.5	60.5	0.463323	0.36208	117	113	43.75	33.5	51.25	53.5	0.46101	0.3886
76	AUS 369	89.755	47.0175	100.493	87.4975	0.470623	0.34633	99	100	42.5	37.3333	54.5	56	0.420973	0.396793	115	NA	47.8	34.8	58.8	56	0.44522	0.3426
77	AUS 382	73.9675	66.9575	103.02	109.868	0.408138	0.367976	102	106	NA	NA	NA	NA	NA	NA	NA	NA	NA	NA	NA	NA	NA	NA
78	AUS 385	49.4025	52.095	82.3525	74.2275	0.368787	0.411221	100	104	30.75	28.25	55.5	64.25	0.355594	0.305907	113	117	47.75	40.25	62	60.75	0.4419	0.3945
79	AUS 391	76.2475	41.3425	99.2375	64.3875	0.432533	0.380303	99	99	46.75	35.75	76.25	87.75	0.383752	0.268843	112	113	45.25	50.25	77.5	76	0.3683	0.3981
80	AUS 401	84.37	73.1075	112.457	130.905	0.436686	0.353242	99	100	39.5	38.75	72	83.5	0.3507	0.322547	113	113	49.3	51.75	75.5	107.75	0.3906	0.3238
81	AUS 411	69.425	33.7125	101.968	73.52	0.402675	0.319059	102	106	41	30.25	65.5	71.75	0.378072	0.292446	117	117	47.3	40.5	84.5	76.5	0.3532	0.3426
82	AUS 414	98.92	72.315	106.45	94.1675	0.481054	0.423026	102	104	46.25	31.5	58.5	63.5	0.444702	0.345347	119	117	52.25	46	76.5	65.5	0.4061	0.4106
83	AUS 415	90.2875	51.6075	99.12	76.2775	0.479739	0.406649	102	104	31.75	33.5	48	46	0.366936	0.430574	119	121	42.25	42.5	52.5	68.3	0.44317	0.3832
84	AUS 417	68.25	77.6825	94.1875	88.4125	0.406079	0.464941	102	104	36	18.5	57.75	37.25	0.34395	0.340255	119	121	NA	NA	NA	NA	NA	NA
85	AUS 420	69.5525	48.755	110.55	99.5225	0.38125	0.335029	108	110	28.75	20.75	69.25	63.25	0.299881	0.239739	121	119	38.25	38	56.5	74.25	0.4016	0.3384
86	AUS 435	82.395	58.715	91.715	84.6575	0.472438	0.392113	99	102	36.25	42.25	59.75	66	0.371772	0.388762	119	117	51	35.25	69	69.5	0.4223	0.3388
87	AUS 440	67.5675	45.89	82.73	80.49	0.449585	0.360762	106	106	34.5	24.5	52.75	59.5	0.383894	0.28602	113	121	37.5	36	68.5	65.25	0.3576	0.361
88	AUS 453	71.365	66.8525	77.195	92.99	0.475812	0.408899	102	102	44.5	36.5	60.25	70.25	0.42203	0.338408	117	117	51.3	54.75	72.3	87.25	0.4118	0.3814
89	AUS 455	64.9275	46.255	104.01	102.198	0.375443	0.310614	100	104	33.25	16.6667	64.5	50.6667	0.338596	0.24256	117	117	NA	NA	NA	NA	NA	NA
90	AUS 462	70.14	54.2175	79.3725	77.59	0.463223	0.400833	102	110	41.75	25	55.75	53.3333	0.417541	0.286205	121	123	60.5	33.25	81.3	47	0.4276	0.4147
91	AUS 464	69.4	59.3975	80.815	92.1375	0.46295	0.38898	100	100	33.75	26	46.5	59.75	0.408173	0.304971	113	115	41.75	34	54.75	62	0.4304	0.3593
92	BORO 354	111.808	86.73	193.512	150.765	0.368865	0.347361	99	100	76.25	58.5	152	132.75	0.332864	0.303396	115	117	85.3	68.75	174.25	159.8	0.3243	0.29943
93	BALAM AUS	81.74	76.575	106.118	112.05	0.421212	0.395275	100	100	46.25	33.5	77.5	59.5	0.381141	0.367015	121	119	39	37.75	75.5	69.75	0.3406	0.3435
94	BORO	111.885	84.5525	140.95	120.382	0.442861	0.418359	102	110	69.75	57.3333	125.5	129	0.355915	0.31222	119	121	72.5	57	116.5	98.8	0.3805	0.366
95	BORO BLACK	NA	NA	NA	NA	NA	NA	NA	NA	NA	NA	NA	NA	NA	NA	NA	NA	NA	NA	NA	NA	NA	NA
96	BCULARN	87.5575	48.12	122.2	77.2925	0.414871	0.375235	96	100	41.75	59.75	109.5	135.5	0.268135	0.295936	113	115	65.75	42	148	126	0.3141	0.25302
97	AUSMERI	61.1275	43.25	118.93	116.817	0.342359	0.265724	96	98	55.5	45.6667	97.5	96.3333	0.368834	0.310298	113	113	76.5	48.75	128.5	126.8	0.3698	0.2799
98	ARC 14108	65.895	32.9775	80.33	80.4275	0.446233	0.305204	100	100	36	40	60.5	90.75	0.373084	0.315707	115	115	42	58.25	59.75	88.25	0.4086	0.3987
99	ARC 14855	67.155	57.79	112.93	92.1	0.369479	0.382912	100	102	59.25	51.75	89.25	123.5	0.395658	0.294669	119	119	67.5	62.75	106.25	104.75	0.3862	0.3689
100	ARC 14915	25.175	NA	81.955	NA	0.244004	NA	100	102	10.75	13	36.25	33.75	0.222877	0.288179	121	115	NA	NA	NA	NA	NA	NA
101	ARC 14950	87.8775	NA	99.885	NA	0.470684	NA	100	102	27.75	20.75	51	40.25	0.326899	0.344656	117	121	37.75	37	71.75	67	0.348	0.3482
102	ARC 14965	61.6775	48.8475	71.3475	104.918	0.465101	0.321618	97	100	49.25	48.5	62.75	76	0.415849	0.386454	108	111	NA	NA	NA	NA	NA	NA
103	ARC 14969	58.63	49.285	81.12	89.9575	0.42646	0.347125	99	102	39.5	40.5	69.75	76	0.354052	0.346119	113	113	50.25	51.25	78	92.75	0.3869	0.35609
104	ARC 7098	96.515	NA	109.088	NA	0.461316	NA	99	NA	40.5	37.5	66.75	77.75	0.372068	0.328856	117	117	106.75	79.3	126.8	108.5	0.45806	0.4175
105	BROWN GORA S.B. 92	94.325	55.1333	93.98	81.2567	0.495448	0.406035	99	99	43.25	15.25	60	54	0.395393	0.199021	119	113	49.5	34	75.5	75.25	0.3899	0.309
106	AUS PADDY(BLACK)	65.7075	51.96	72.43	70.1625	0.47017	0.426817	99	99	42.75	34.75	65	69.5	0.378904	0.346407	113	117	55.3	52	75	75.8	0.4193	0.3943
107	AUS PADDY(WHITE)	74.545	80.3875	101.983	101.228	0.400571	0.441312	102	100	59.25	37.75	72.75	80.5	0.449418	0.310204	117	117	52	37.5	69	57.25	0.4288	0.3602
108	ANJANI	43.6525	32.97	70.3725	82.41	0.373903	0.306407	99	99	29.75	21.6667	62.5	60.6667	0.297921	0.254527	110	110	25	18	57	56.5	0.3095	0.2403
109	BAUSPHR	120.61	68.965	139.3	97.8825	0.448986	0.395871	104	106	44.6667	34.25	73	74.5	0.383036	0.309688	NA	121	46.75	56.3	71.25	76	0.39	0.42582
110	BIR CONA	89.9875	56.5925	109.297	84.91	0.452074	0.403529	102	104	41.25	47.5	62.75	69.75	0.392004	0.372328	119	117	44.25	40.5	64.25	75.5	0.3949	0.3524
111	AUS KUSHI	77.8025	61.67	104.142	83.1675	0.425819	0.419467	100	100	51.25	47	47.75	65.25	0.521661	0.417638	119	121	52.75	54.5	60.5	75	0.4653	0.4208
112	MTU18	NA	NA	NA	NA	NA	NA	NA	NA	NA	NA	NA	NA	NA	NA	NA	NA	NA	NA	NA	NA	NA	NA
113	SLO 19	69.9025	64.2475	101.44	80.74	0.390506	0.443333	100	104	32.75	32	73.75	79.75	0.301027	0.284609	115	117	40.75	35.25	87.25	74.5	0.3116	0.3221
114	EARLY SUTARSAR 39	100.735	58.9875	107.558	102.377	0.47884	0.363911	100	102	34.75	15	59.25	27.6667	0.375831	0.398865	125	121	38.5	30.3	64	48.33	0.3611	0.3599
115	PHULPATTAS 72	77.4525	48.1525	160.22	138.72	0.325416	0.256334	108	106	18	16.25	61	48.5	0.230209	0.232264	121	119	42.5	31.25	77.8	67.3	0.3438	0.3057
116	DA 12	73.5575	52.7025	111.23	83.885	0.399774	0.383913	102	102	47.5	36.25	65	71.75	0.421445	0.322492	117	117	48	48.25	65.5	91.5	0.4277	0.3517
117	KADA-68-1	52.5175	50.07	87.7425	70.31	0.334017	0.40214	99	100	41.25	37	77.75	74.25	0.344792	0.32214	110	117	49.25	35	91.8	113.5	0.3528	0.2329
118	DF3	72.67	40.3975	82.3125	83.3075	0.463911	0.336098	99	100	34	34	50.5	67.25	0.393082	0.337202	110	113	59	46.3	79.5	77.25	0.42569	0.3547
119	CTG250	94.6175	72.6467	107.463	98.7133	0.466192	0.423575	100	104	36.25	27.75	52.75	54.75	0.395116	0.328726	117	121	52.25	49.5	92.75	82.75	0.36001	0.3719
120	JW102	90.795	75.04	98.06	100.293	0.464924	0.433006	97	100	43.25	33	84.75	83.25	0.338196	0.284428	113	113	55.3	35	99.25	77.75	0.3507	0.31018
121	KHAILAORGOABEZ	88.7975	76.0375	144.98	123.377	0.37318	0.386723	100	104	52.25	65.3333	97	144	0.337583	0.312012	112	117	77.3	62.25	169.8	155	0.3072	0.2902
122	KELE(AUS)	91.6225	48.7425	108.493	90.4225	0.459286	0.34457	100	102	80	70	114.25	121.25	0.411738	0.366033	115	115	72.75	79	113.75	103	0.3874	0.4266
123	CHAMKA	96.74	66.1525	112.125	112.213	0.462648	0.346402	102	100	52.75	52.5	112	93.25	0.322182	0.355845	113	115	44	75.25	77	116.75	0.3582	0.3912
124	KALOSHAITA	99.2975	71.235	110.56	99.8225	0.47375	0.407244	100	100	44.5	61.75	81.75	101	0.36615	0.378632	113	113	64.3	72.25	84	112.25	0.4306	0.3916
125	KUMBI	55.485	43.035	87.345	70.325	0.381909	0.389745	98	98	39.3333	25.75	47	67.75	0.481144	0.273653	113	110	46	56	82	77.25	0.3643	0.417
126	MUNSHISHAIL	82.075	49.5075	99.0175	80.625	0.44825	0.371904	106	104	35.6667	25.25	76	54.25	0.309709	0.317336	NA	121	51.5	42	79.5	64.75	0.3922	0.3973
127	SHONI	106.49	71.155	130.865	89.9375	0.455536	0.437816	100	100	55	62.25	83.5	101	0.400687	0.372823	110	110	59.5	44	81.5	89.8	0.4071	0.3438
128	PURA NUKNA	87.1475	71.85	109.82	132.165	0.44207	0.337715	98	100	56	38	71.75	63	0.402367	0.369556	110	115	63	66	113	115.3	0.355	0.3685
129	CUNAIL	91.6025	49.11	141.583	108.695	0.387539	0.308981	102	104	66.75	71	134.25	169.75	0.330866	0.298023	113	115	89.5	82.5	146.25	160.5	0.3755	0.3403
130	FAISHA MANSA	NA	NA	NA	NA	NA	NA	NA	NA	NA	NA	NA	NA	NA	NA	NA	NA	NA	NA	NA	NA	NA	NA
131	KANCHA NONI	62.51	49.18	109.7	119.753	0.373597	0.292693	104	104	27.75	22.5	62.75	93.25	0.297593	0.192064	121	121	33	37.75	60.75	75.75	0.3507	0.3327
132	PHUL DUMRA	90.7233	NA	102.347	NA	0.469978	NA	99	101	57.5	37.5	71.75	64.75	0.441946	0.361778	110	113	52.5	50.5	73	72	0.4129	0.41232
133	DHALIBORO 105-2	114.3	79.2267	150.393	121.76	0.428646	0.397741	102	102	64.5	67.25	105	158	0.367697	0.29595	113	115	72.5	81.25	171.8	151	0.2949	0.3494
134	DHALIBORO 111-3	129.43	82.0267	200.635	118.887	0.392922	0.396055	102	102	89.25	54	144.25	161.5	0.379749	0.253501	115	115	NA	NA	NA	NA	NA	NA
135	KALIBORO 2-2	94.82	80.59	145.827	125.752	0.395321	0.386901	102	100	59.75	47.75	139.75	137.5	0.292003	0.291824	110	113	79.75	54	146.3	120.3	0.3522	0.316
136	KALIBORO 26	101.552	75.4375	191.093	155.045	0.348685	0.324746	99	100	70.75	69.5	133	156.5	0.349577	0.308949	113	115	90.3	78.3	125.5	159.5	0.4075	0.3245
137	KALIBORO 41-1	99.4975	88.26	134.315	123.728	0.423648	0.403338	102	102	73.75	61.75	130	155.75	0.359329	0.285916	111	117	60	85.75	116	147	0.3459	0.36992
138	KALIBORO 80-3	101.775	73.5025	151.433	110.375	0.400987	0.364306	100	100	63.75	65.75	108.5	159.5	0.388998	0.291961	111	117	49.5	62.25	124.3	146	0.2997	0.3067
139	KALIBORO 138-2	87.7675	70.235	151.04	127.945	0.35693	0.363785	99	100	55.75	60.25	146.5	128	0.283906	0.337507	117	115	72.5	67.5	162.3	151	0.3126	0.3024
140	KALIBORO 704	120.21	90.68	178.308	148.398	0.396886	0.374959	102	102	84.75	59.25	137.25	129.5	0.386213	0.302894	113	112	69.3	73.5	167.5	144.3	0.2831	0.34
141	KAL BURI	71.9325	59.145	110.047	99.0825	0.391036	0.373061	97	100	59.25	47.25	96	97.25	0.381266	0.328942	110	113	56.75	48	84	102.3	0.403	0.3213
142	SHADA BORO	104.73	72.2775	121.345	113.153	0.473444	0.374868	102	102	65.75	68	94	125.5	0.362512	0.350348	115	119	84.75	68.8	121	124.8	0.4175	0.3559
143	JAGAL-1640 A	111.97	49.4125	153.175	125.188	0.42678	0.264755	102	100	76.75	52.25	132	128.75	0.372453	0.287639	117	117	89.5	61.75	132.5	146.5	0.4048	0.302
144	CHANDRA KANA	37.49	22.705	112.218	85.285	0.233062	0.218323	99	104	23.75	14.5	75.75	75	0.237287	0.159601	113	117	18	24.5	85.3	94.3	0.177	0.2136
145	CHANDRA MUKHI	93.5325	63.3325	112.757	126.998	0.441955	0.324666	102	102	57.5	70.5	94	104.5	0.381552	0.398367	117	117	74	66.75	110	112.5	0.4007	0.3748
146	GOHAMA BHADRI	63.615	55.0475	99.9825	94.035	0.368784	0.363629	99	100	48	20.25	68.5	45.5	0.409836	0.285652	115	115	68.5	50.25	99.3	85	0.4012	0.3687
147	HIJLI	77.0325	64.82	118.888	111.31	0.386338	0.368909	99	102	44.75	43.5	73.25	84.5	0.377685	0.330802	113	113	84	39.25	127	75.3	0.3975	0.3457
148	JAGAL	71.715	NA	109.983	NA	0.381495	NA	99	104	30.25	10.25	55.25	25.5	0.317735	0.268538	115	117	42	49	67.8	81.5	0.3837	0.3741
149	JATI AUS	76.5	42.7033	128.44	83.47	0.380502	0.332165	104	104	56	12.5	67.5	38.5	0.406693	0.246166	121	123	40.5	43.75	61.5	73.25	0.4004	0.3662
150	KALINDI	94.245	60.7425	105.978	80.6175	0.471743	0.411733	100	100	60.25	33.5	80.25	63.5	0.45692	0.326878	119	117	75.25	53.75	93.5	84.25	0.4472	0.3903
151	KALO BIRA	105.317	82.065	116.347	116.03	0.47134	0.412771	98	100	62.75	41.25	78	69	0.446764	0.350256	113	112	61.5	57.3	92.5	88	0.39984	0.3769
152	KELE BARI	49.7475	50.5425	74.77	105.94	0.382522	0.34023	98	96	NA	NA	NA	NA	NA	NA	NA	NA	73	50.25	100.5	75.75	0.42291	0.403
153	KHASHIA PANJA	73.1775	60.205	105.588	110.618	0.402176	0.346478	100	104	41.75	24	68	41	0.379878	0.373731	119	121	NA	NA	NA	NA	NA	NA
154	KUBIL RASH	95.5625	68.2	93.96	108.787	0.503153	0.37355	99	100	50.25	40.6667	60	88.6667	0.45331	0.31266	117	115	44.25	37	64	57.5	0.4096	0.372
155	M 136-20	70.7075	NA	169.675	NA	0.281778	NA	108	104	22.75	13	100.25	68.25	0.207304	0.166997	110	127	67	28.25	124.5	72	0.3475	0.2837
156	NAI DUMUR	76.965	37.7975	97.765	73.305	0.438627	0.326028	100	102	45.5	NA	72.5	NA	0.385964	NA	110	NA	61.3	45	91	74.5	0.3983	0.3763
157	PADMA SAIL	63.1975	74.8133	75.985	97.7033	0.44681	0.403931	104	104	33.25	13	44.25	27.25	0.430951	0.318315	119	125	29.25	31	105.5	60.3	0.2221	0.3299
158	SHAMLA MEGHI	59.8375	34.7825	87.4775	77.5675	0.40529	0.302302	104	104	28.3333	31.25	66	82.75	0.298465	0.261057	117	121	58.75	37.25	83.5	90.3	0.4157	0.2869
159	SHETE BHADO	36.59	44.5475	86.5825	84.4575	0.291375	0.345626	99	102	33	24.25	67	78.75	0.337322	0.23613	113	117	40.25	19	98	76.5	0.2937	0.2025
160	SOA MUKHI	97.615	90.0125	158.095	116.405	0.382036	0.4412	106	110	55.25	52	90.75	100.333	0.377911	0.31607	121	121	64.5	61.5	105.8	113	0.3839	0.3492
161	SOASI	101.465	69.335	110.485	97.2025	0.472899	0.407435	100	100	66	NA	97.75	NA	0.398568	NA	113	115	88.25	83	135.5	144.5	0.3976	0.363
162	SXC290	80.9	56.0825	106.575	91.465	0.423434	0.373011	102	104	59.75	42.75	101.25	97.25	0.368015	0.305513	113	113	64.5	49.5	126	121.5	0.3463	0.2895
163	HABIGANJ BORO 2	78.8575	81.9975	80.5125	92.375	0.498151	0.469774	106	110	52	44.5	74.75	74	0.409271	0.37014	121	117	46.5	66.3	83	76	0.35	0.4596
164	SORIBHOG	60.025	69.2625	75.2225	87.9625	0.420862	0.436655	102	100	41	30.6667	58.75	50.3333	0.408642	0.37747	117	NA	49.5	46.75	68.8	81.25	0.4249	0.3628
165	DESHI BORO	62.985	51.2175	154.898	115.267	0.275993	0.310864	106	110	50.75	46	115	138.75	0.304078	0.252717	119	125	75.5	75.25	169	178	0.3077	0.2954
166	JAGLE BORO	127.052	87.31	141.868	120.453	0.471247	0.421956	99	100	108	70.25	151	152.5	0.418299	0.314549	121	117	81	66	108.8	104.25	0.42787	0.3819
167	SORISHAFUL	48.2525	64.5875	75.8225	80.3175	0.361144	0.444168	97	100	33	26.75	63.5	61.25	0.326693	0.299832	109	115	30.5	46.33	57	71	0.347	0.3961
168	KADA-176-12	75.2675	46.475	92.77	73.655	0.446886	0.371203	100	100	44.5	36.5	92.5	94.75	0.325189	0.268105	110	110	46.5	36.25	107.5	98.75	0.3003	0.2691
169	DHALAI KACHARI	83.5925	62.0075	112.79	92.2875	0.414251	0.396407	102	100	33	18.6667	43.75	46	0.441191	0.289767	121	119	34.75	38.25	50.5	67.25	0.4014	0.3553
170	GOTA LEMMA	69.3675	47.705	90.295	99.83	0.431816	0.323784	102	102	46	32.3333	72	71	0.384193	0.315083	117	117	55.5	42.75	86.8	88	0.3992	0.3212
171	MOTZHUL	NA	NA	NA	NA	NA	NA	96	NA	NA	NA	NA	NA	NA	NA	NA	NA	NA	NA	NA	NA	NA	NA
172	CN2-175-5-31	62.4675	57.2825	88.83	89.215	0.404417	0.370876	108	100	31.75	31.5	76.25	79.25	0.287859	0.281157	113	111	45	38.25	94.8	90.8	0.325	0.299
173	DHINGHA	67.5875	60.71	99.495	112.063	0.397492	0.321316	100	100	32.5	33	68.5	79.6667	0.327935	0.293949	113	114	52	51.25	100.3	89.25	0.34219	0.3634
174	DA2	71.195	54.9425	123.26	101.16	0.366716	0.354363	104	112	60.75	50	136.5	166.75	0.296348	0.23032	119	121	90.3	74.8	161.5	145	0.3608	0.3357
175	GOUERISAIL	86.04	90.9425	101.545	106.23	0.457382	0.429133	104	104	49	36.25	67.75	61.5	0.4148	0.364224	121	121	45.25	51.75	74.5	78.75	0.3788	0.3983
176	Code No BI 93	103.59	70.565	152.55	155.67	0.404553	0.306084	114	112	50.25	44.75	73.25	107	0.405109	0.290302	115	125	50	65.5	93	126.5	0.3473	0.3398
177	KALI AUS	90.9375	NA	101.998	NA	0.472556	NA	100	100	63.6667	62.75	83	99.5	0.4329	0.389036	NA	113	61.5	49.5	93.5	78.75	0.3894	0.3881
178	PARBATJIRA	73.9025	NA	116.177	NA	0.393333	NA	99	100	63.25	51.5	96	97	0.371998	0.337282	111	113	54.8	41.5	108	85	0.3416	0.3245
179	SATHA	87.535	60.3425	97.175	89.155	0.473816	0.392132	97	99	44	36.3333	81.3333	86	0.348445	0.297313	110	117	39.75	44	95.8	76.5	0.301	0.358
180	DULAAUS	95.86	NA	154.075	NA	0.380793	NA	104	110	69.75	46.3333	132.75	119	0.339408	0.280137	117	119	74.25	65.25	134	135.75	0.3572	0.3211
181	CHINGER	63.4325	NA	79.9175	NA	0.4393	NA	97	98	39.25	45.25	61.25	71.5	0.380898	0.386977	107	110	42.5	43.75	68	83.25	0.3886	0.3388
182	RAJBHOG	44.015	34.34	68.57	66.325	0.377038	0.338044	98	98	47.25	34.25	104.75	109.5	0.303625	0.242829	112	121	45.25	47.5	89.75	102.5	0.3284	0.3069
183	T 65	107.275	NA	128.202	NA	0.448971	NA	104	100	NA	NA	NA	NA	NA	NA	NA	NA	NA	NA	NA	NA	NA	NA
184	SAITA BORO	126.665	93.2675	151.938	121.305	0.453926	0.430554	96	99	82.75	99.5	131	164.25	0.358438	0.378183	109	113	94.25	90.8	125.5	121.5	0.4277	0.4321
185	KUDA	76.4325	58.9275	95.1375	84.32	0.441799	0.393284	98	100	34.5	28.5	65.5	75.75	0.336728	0.275111	115	115	50.5	58	96.5	124.5	0.3421	0.3216
186	JABAR SAIL	85.1525	66.59	114.09	97.9625	0.427118	0.397449	99	104	27	25	60.25	74.75	0.318231	0.243478	121	121	47.5	39.25	65.75	57.5	0.4217	0.4022
187	KALASU	105.29	NA	107.37	NA	0.49523	NA	99	99	74.5	60.6667	101.75	101	0.424431	0.371351	113	117	54.5	65.5	73	93	0.4345	0.4114
188	JABOR SAIL	90.035	64.55	109.32	99.1075	0.448838	0.38404	102	104	34.25	22.75	73	38.25	0.290004	0.371246	121	121	39.75	32.25	59.5	63.8	0.3977	0.3474
189	DUBHI GORA	84.07	NA	108.565	NA	0.433834	NA	97	100	45.75	41.25	69.75	68.75	0.392322	0.369172	113	119	42.5	38.5	77.75	64	0.3483	0.3707
190	NAGRI	NA	NA	NA	NA	NA	NA	100	NA	36	30.25	74.5	67.25	0.325341	0.302181	115	115	28.5	25.25	52	59	0.3496	0.313
191	DJ29	96.6875	NA	125.957	NA	0.431861	NA	98	100	74.5	56.25	88.5	68.25	0.457933	0.44904	115	117	69.5	50.5	96.5	92.3	0.4169	0.3397
192	CHENGRI 1	84.4875	40.855	99.395	79.305	0.464707	0.329091	98	98	59	29	91	64	0.393472	0.2906	115	115	54.75	28	94.75	60.8	0.3625	0.3311
193	LALI BORO	108.838	91.29	135.24	100.062	0.442725	0.477842	104	110	67.3333	48.25	90	74	0.428639	0.39406	125	127	77	79.5	125	115.3	0.3817	0.40986
194	JABAHUL	82.615	65.6525	114.002	95.3225	0.417741	0.406029	98	100	54	70	79	83.75	0.398819	0.453749	115	113	56	69.5	77.25	111	0.4227	0.3864
195	RAJ MUNDO	61.4	NA	102.315	NA	0.373092	NA	97	100	38	65.5	71.75	99	0.325018	0.403023	107	110	52	47.8	94.3	77	0.3489	0.3551
196	TEPA BORO 508	89.235	103.59	197.463	191.235	0.308466	0.362559	116	106	56.75	65.75	131	176.25	0.297032	0.275415	125	129	70	67.25	180.5	160.8	0.2786	0.2959
197	W 418	87.68	70.9375	119.362	100.843	0.425596	0.416217	98	99	42.5	36.75	75.75	99.25	0.357635	0.264783	113	115	NA	NA	NA	NA	NA	NA
198	WHITE DUBHI	88.81	68.4325	122.85	122.043	0.414344	0.361853	99	104	80.6667	56.25	127	109.5	0.384818	0.337635	113	119	80.8	100.75	124.3	136.3	0.3874	0.4279
199	ARC 7229	40.9375	38.145	82.425	89.4825	0.316729	0.266486	116	116	16.6667	NA	50.6667	NA	0.238452	NA	127	NA	21	15.5	76.5	40.8	0.2095	0.2829
200	BJ 1	140.847	120.228	180.81	173.215	0.444831	0.411106	106	104	102.25	95.75	145.25	186.75	0.408823	0.338312	121	119	127	107.75	173.75	147.75	0.423	0.42225
201	Black Gora	92.055	64.4475	121.918	110.203	0.428824	0.363267	100	100	65	52.5	91.5	80	0.409723	0.398342	110	115	59.5	45	120.25	88.8	0.3335	0.3324
202	Dhala Shaitta	59.4575	35.9275	71.92	69.7275	0.446782	0.351684	99	100	54.25	47	73.5	61.5	0.423419	0.432958	115	115	66.25	65.5	86.75	86.5	0.4296	0.4276
203	DV85	86.6875	58.5925	105.707	98.39	0.447624	0.367915	102	104	48	37.75	87.25	72	0.344856	0.339174	113	113	62	45.75	98	72	0.3788	0.3848
204	DZ78	71.66	60.74	124.502	116.007	0.364559	0.333394	100	102	53.5	36.5	86	81.25	0.379502	0.304336	113	113	52.5	56.25	91.3	72	0.3472	0.4427
205	Jhona 349	71.6075	64.7775	90.4325	96.65	0.441783	0.399512	102	100	61	72.25	62.5	103.75	0.494872	0.383419	113	117	64.75	46.5	92.8	99.25	0.4137	0.3102
206	Kalamkati	56.0025	54.4175	106.153	114.603	0.332579	0.316475	100	102	32.25	42.5	67	83	0.324436	0.331635	113	117	69.8	62.5	101	106.3	0.4016	0.3692
207	Kasalath	89.535	97.215	114.265	119.332	0.441124	0.436681	110	110	55.25	41.6667	90	77.3333	0.387413	0.331986	123	129	66.25	70.8	91	103.5	0.4201	0.4174
208	T 1	79.7575	31.63	110.188	91.04	0.41225	0.274671	100	104	48.75	NA	80.25	NA	0.336026	NA	115	115	NA	NA	NA	NA	NA	NA
209	T26	77.6125	46.9525	128.575	95.235	0.378132	0.319562	102	106	52.75	12	73.25	54.25	0.414672	0.19531	117	117	38.25	33.75	84.5	69.5	0.321	0.325
210	ARC 6578	56.4375	26.7025	129.495	71.285	0.310981	0.251079	110	120	16	NA	52.75	NA	0.226562	NA	115	119	NA	NA	NA	NA	NA	NA
211	CTG 1516	77.32	77.4925	102.11	103.965	0.431483	0.420314	102	110	37	21.5	64.5	42.5	0.365735	0.292595	117	115	40.5	40.25	77.3	63	0.3508	0.3859
212	DD 62	92.235	80.9975	100.475	95.0725	0.476016	0.450813	104	110	55.5	53	70	74.75	0.441853	0.417434	117	121	52	52	71.25	72.75	0.42304	0.4128
213	DJ 123	75.96	55.4	85.2925	100.26	0.471378	0.357128	96	98	51	49	70.5	81.25	0.418898	0.370626	109	110	56.75	45	70.3	66.25	0.44778	0.4002
214	DJ 24	61.0475	60.0425	104.785	108.668	0.361302	0.342271	104	106	33.75	23.5	65	57.75	0.318087	0.28882	121	121	39.25	42.3	66.5	69.3	0.3754	0.3387
215	DM 43	76.3625	76.3	108.775	104.692	0.406586	0.403601	102	102	53.5	46	83.75	107	0.391437	0.291585	117	115	57.5	35	86.5	70.8	0.3987	0.3292
216	DM 56	43.645	50.785	57.6125	69.6875	0.430985	0.377952	104	110	22.75	22.25	46.75	43.25	0.328163	0.358406	119	121	32	36.75	51.3	64.8	0.3913	0.3625
217	DM 59	109.713	85.9067	133.873	103.05	0.442113	0.451758	106	110	56.75	37.75	77.75	62	0.421831	0.367025	119	121	60.5	53.75	91.8	75	0.4059	0.41716
218	DNJ 140	76.8475	47.85	123.728	105.33	0.37851	0.300157	114	110	42.25	26.75	84.75	63.25	0.319153	0.273937	119	121	NA	NA	NA	NA	NA	NA
219	DV 123	50.1325	39.96	66.47	72.6525	0.430078	0.349068	102	104	27.5	12.5	34	25.25	0.432724	0.314424	115	113	30.75	34.25	53.5	67.5	0.36629	0.349
220	Ghorbhai	65.665	45.8725	89.3575	87.7325	0.413207	0.333756	102	106	27.75	12.6667	50.75	31.6667	0.364663	0.273171	121	121	37	40.75	74	51.8	0.3311	0.484
221	Goria	77.4025	36.1625	92.5025	73.7925	0.457127	0.322812	99	97	52	54.5	121.25	90.5	0.342353	0.386318	113	113	61.5	46.5	90.25	94.75	0.4064	0.3283
222	Jamir	77.93	73.6075	144.773	199.19	0.335403	0.273079	98	100	69.5	44.75	99.5	89.5	0.406464	0.307458	113	113	65.8	49	135.8	129.5	0.3227	0.2748
223	Kachilon	77.5775	39.235	99.005	90.7075	0.437305	0.31653	98	99	46	NA	76.75	NA	0.373855	NA	112	115	47.8	35	75	62.25	0.3515	0.3566
224	DZ 193	79.4	71.375	113.338	117.772	0.407507	0.371113	100	100	35.6667	36.3333	50.6667	55.6667	0.407829	0.383306	NA	115	NA	NA	NA	NA	NA	NA
225	Karkati 87	91.925	68.4025	97.3175	104.225	0.48468	0.400545	102	100	59.5	47.3333	107.25	94.6667	0.349071	0.332471	113	113	58.3	47.75	100	89.5	0.3834	0.3456
226	ARC 10376	58.0425	46.6425	65.825	93.7075	0.456487	0.304902	100	102	53.5	32.5	67.5	64.75	0.426703	0.329557	115	117	50.75	52.3	62.75	75.3	0.4448	0.3919
227	9524	59.1875	27.03	127.683	92.4975	0.318014	0.230478	108	118	29	8	60.25	18.5	0.303323	0.238095	115	125	NA	NA	NA	NA	NA	NA
228	Surjamkuhi	53.35	65.7525	69.375	87.025	0.426339	0.422986	102	100	29.25	16.6667	45.5	37.6667	0.385949	0.304652	121	119	34.75	18.25	58.75	36	0.3587	0.3441
229	PTB 30	71.88	46.705	93.3425	85.465	0.434435	0.343662	104	104	28	NA	54.75	NA	0.327051	NA	121	121	23.75	18.75	46.25	48.25	0.3328	0.2858
230	Bawoi	106.448	67.8675	166.023	122.64	0.387728	0.351088	99	104	61.25	49.3333	125.25	123.667	0.323148	0.283734	113	NA	72.5	43.67	132.75	97.67	0.3443	0.3051
231	Lakhai	88.3825	75.925	152.135	148.065	0.351344	0.331823	104	104	41	39	126.75	130.667	0.240442	0.236746	115	NA	NA	NA	NA	NA	NA	NA
232	Boraya	NA	NA	NA	NA	NA	NA	NA	NA	NA	NA	NA	NA	NA	NA	NA	NA	NA	NA	NA	NA	NA	NA
233	Bogura	114.89	70.295	148.315	106.96	0.434379	0.386019	102	104	42.25	56.25	117	171.5	0.254307	0.24558	117	117	59.5	51.75	114	162.5	0.345	0.2392
234	Lahaya	74.49	69.7125	144.357	115.802	0.348663	0.386248	104	104	34.5	33.75	131.75	137	0.206298	0.196351	121	119	NA	NA	NA	NA	NA	NA
235	Deshi boro	68.8325	59.7725	146.515	118.29	0.328652	0.342415	104	104	66	54.75	128.25	154.5	0.344151	0.262333	113	121	NA	NA	NA	NA	NA	NA
236	Tupa	110.478	90.6975	149.298	134.715	0.423813	0.40841	104	110	76.25	53	141	137.5	0.349662	0.274025	117	125	96.75	76.3	174.25	164	0.35699	0.3122
237	Chhola boro	87.9275	98.05	148.123	137.588	0.367031	0.401709	102	102	75.25	57.6667	167.75	165.333	0.312949	0.260837	119	117	75.5	78.25	176.8	160	0.3019	0.3315
238	Chhola boro(2)	100.67	75.96	140.93	125.373	0.423022	0.373852	98	100	73.75	81.5	137.75	176	0.343645	0.3213	113	113	103.8	117.8	181.8	169.3	0.3623	0.4094
239	Lafai	99.99	79.2025	122.515	140.945	0.449726	0.365351	102	104	79	76.75	155.25	197.75	0.341427	0.27619	113	117	77.5	67.67	143.8	140	0.34927	0.3262
240	Omni boro	NA	NA	NA	NA	NA	NA	NA	NA	NA	NA	NA	NA	NA	NA	NA	NA	NA	NA	NA	NA	NA	NA
241	Chaili boroi	98.5275	90.1575	160.447	149.84	0.381735	0.36565	100	100	45.5	68	87.75	166.25	0.348266	0.288604	115	117	85	96	185	213.8	0.313	0.3097
242	Sada boro	100.055	77.6675	147.765	128.428	0.404493	0.373825	98	98	70	62.75	149.75	158.25	0.317592	0.282304	113	113	62	70.75	144.5	144.3	0.3	0.3285
243	Gobir sail	77.6575	90.74	151.33	151.145	0.335673	0.361671	102	104	67	43.25	141.75	95.75	0.322438	0.374309	115	115	NA	NA	NA	NA	NA	NA
244	Dumsia 81	NA	NA	NA	NA	NA	NA	NA	NA	NA	NA	NA	NA	NA	NA	NA	NA	NA	NA	NA	NA	NA	NA
245	Tulsi boro	120.498	87.6875	171.055	140.655	0.408627	0.376445	100	102	60	62.75	140.25	163.5	0.297865	0.277066	121	117	89.5	83	169.8	182.7	0.3454	0.3159
246	Gachi	96.9625	76.0025	114.632	99.025	0.454499	0.423516	102	102	50.25	38.75	102.25	104.25	0.335758	0.269461	119	117	NA	NA	NA	NA	NA	NA
247	Gul tepi	NA	NA	NA	NA	NA	NA	NA	NA	NA	NA	NA	NA	NA	NA	NA	NA	NA	NA	NA	NA	NA	NA
248	Rata boro	109.468	80.9575	152.145	163.1	0.413987	0.327435	102	102	33	82.75	96	129.75	0.243473	0.389521	117	115	85.25	98.3	152.25	195.7	0.3596	0.33596
249	Choudhury sail	NA	NA	NA	NA	NA	NA	NA	NA	NA	NA	NA	NA	NA	NA	NA	NA	NA	NA	NA	NA	NA	NA
250	Bachi boro	106.438	76.1225	133.6	106.57	0.446709	0.398498	104	102	50.75	42	115	126.75	0.301546	0.24846	117	117	NA	NA	NA	NA	NA	NA
251	Lara	NA	NA	NA	NA	NA	NA	NA	NA	NA	NA	NA	NA	NA	NA	NA	NA	NA	NA	NA	NA	NA	NA
252	Asahi	84.23	47.9325	99.7825	68.685	0.459319	0.412602	100	98	55.25	35.25	54.5	66.5	0.498457	0.344894	110	110	NA	NA	NA	NA	NA	NA
253	BR 3	68.1375	68.0567	105.668	77.18	0.385921	0.4363	130	128	29	49.25	77.25	79	0.268951	0.378137	142	139	NA	NA	NA	NA	NA	NA
254	BR 6	105.472	107.688	106.39	101.62	0.498555	0.51551	104	104	41	29.25	55.75	52.75	0.423633	0.354835	115	119	NA	NA	NA	NA	NA	NA
255	BR 16	94.0175	82.535	130.59	136.998	0.419574	0.362522	118	120	NA	NA	NA	NA	NA	NA	NA	NA	NA	NA	NA	NA	NA	NA
256	BRRI dhan 28	100.838	92.19	100.862	98.175	0.50441	0.48417	104	104	66.25	68.75	81.25	104	0.453395	0.393507	119	121	NA	NA	NA	NA	NA	NA
257	BRRI dhan45	92.0375	80.7625	70.03	95.7125	0.57169	0.451057	104	102	53	66.25	68.75	72.75	0.431928	0.47499	115	117	NA	NA	NA	NA	NA	NA
258	BRRI dhan47	132.782	104.733	142.5	140.852	0.486622	0.434542	110	110	46.5	40	71.25	79.25	0.372339	0.332206	123	127	NA	NA	NA	NA	NA	NA
259	BRRI dhan50	50.1325	52.5367	127.21	105.877	0.291956	0.324268	118	120	NA	NA	NA	NA	NA	NA	NA	NA	NA	NA	NA	NA	NA	NA
260	BINA dhan 5	91.955	85.2475	153.933	140.105	0.373139	0.372237	126	130	62.25	64	144.5	137.75	0.300959	0.32281	138	142	NA	NA	NA	NA	NA	NA
261	Iratom 24	66.8925	61.4625	100.73	70.5575	0.403618	0.455248	116	116	47.5	36.75	85.25	81.25	0.343402	0.296016	125	129	NA	NA	NA	NA	NA	NA
262	IARI 6626	45.5325	35.4333	57.1925	66.3033	0.436497	0.346669	108	114	21.25	NA	29.75	NA	0.411104	NA	115	NA	NA	NA	NA	NA	NA	NA
263	IARI 7449	69.085	32.2225	121.478	78.5075	0.364707	0.253958	106	110	37.75	41	81.75	73.3333	0.305849	0.339048	117	117	NA	NA	NA	NA	NA	NA
264	Purple Puttu	NA	NA	NA	NA	NA	NA	NA	NA	NA	NA	NA	NA	NA	NA	NA	NA	NA	NA	NA	NA	NA	NA
265	P 79	74.88	NA	100.29	NA	0.428172	NA	102	104	45	32	64	75.6667	0.419516	0.292824	115	117	50.5	34	122.8	104	0.2964	0.2515
266	Polman	64.665	NA	97.2375	NA	0.398924	NA	104	110	23.5	11.3333	52.5	74.6667	0.311037	0.178139	121	119	29	24.75	42.25	62.25	0.40832	0.287
267	DJ 53	32.175	30.0333	58.48	59.53	0.354015	0.320985	106	110	23.75	19.6667	51.25	25	0.300883	0.42725	117	119	NA	NA	NA	NA	NA	NA
268	Ziri	83.4025	45.35	104.343	119.957	0.444721	0.270503	104	110	NA	NA	NA	NA	NA	NA	NA	NA	NA	NA	NA	NA	NA	NA
269	IARI 6621	58.225	43.2625	96.0725	73.28	0.373918	0.531523	108	116	12.5	11.75	26	25.75	0.352179	0.321469	121	121	NA	NA	NA	NA	NA	NA
270	P 32	73.4625	NA	98.7575	NA	0.426902	NA	102	110	26.5	12.6667	39	40.3333	0.413206	0.291788	121	119	36	18.67	65.25	40.33	0.3533	0.3132
271	99216	72.7425	57.375	89.6525	89.6825	0.414004	0.37652	106	110	21.6667	NA	36.6667	NA	0.388658	NA	125	121	27	14.5	46.8	30.75	0.3654	0.3257
272	NP 97	54.11	38.665	88.5525	87.3625	0.36431	0.314845	104	104	29.75	23.3333	51.25	36.3333	0.364757	0.362348	117	117	NA	NA	NA	NA	NA	NA
273	DV 118	86.77	NA	96.6333	NA	0.46483	NA	102	NA	42.75	34	64.25	56.25	0.40121	0.371742	115	115	34.25	39.3	58.75	65	0.367	0.358
274	Pachodi 427	127.797	76.865	171.602	130.868	0.429344	0.365503	106	106	72	56.25	111.25	117.75	0.393257	0.316258	125	121	114.3	93.3	159.3	140.5	0.4184	0.4014
275	Bowalia	116.782	82.8067	127.465	120.52	0.472616	0.405142	99	99	47.75	43	99	108.25	0.316462	0.296789	113	113	85	74.5	136.5	127.25	0.3864	0.3689
276	ARC 10303	NA	NA	NA	NA	NA	NA	NA	NA	NA	NA	NA	NA	NA	NA	NA	NA	NA	NA	NA	NA	NA	NA
277	ARC 10378	74.8725	58.0975	82.9825	99.06	0.472873	0.348111	98	99	55.6667	45	79	80.3333	0.416537	0.347215	NA	113	NA	NA	NA	NA	NA	NA
278	DA 24	80.8825	77.9775	104.517	120.605	0.432996	0.392394	102	104	51.25	45.25	62	77.5	0.448387	0.363929	113	115	61	44	81.75	71	0.4293	0.3832
279	Thubri	67.765	49.4425	81.1475	81.7775	0.457062	0.369574	98	99	31.5	18	59.5	48.25	0.335867	0.303935	111	115	55	45	94.8	111	0.3642	0.29061
280	Fulbadam	97.715	65.8575	112.75	109.21	0.463657	0.36619	102	100	57	50	83.25	103.75	0.395129	0.317524	119	115	82.75	74.75	98.25	124.3	0.4567	0.3792
281	AZUCENA	NA	NA	NA	NA	NA	NA	116	118	NA	NA	NA	NA	NA	NA	NA	NA	NA	NA	NA	NA	NA	NA
282	DOM SUFID	91.56	73.1475	129.375	168.398	0.418251	0.306403	99	100	46.25	52.5	94.75	101.5	0.330553	0.334487	117	119	NA	NA	NA	NA	NA	NA
283	DULAR	70.6275	NA	83.1475	NA	0.453989	NA	97	100	39	41.5	66	68	0.374643	0.381043	110	113	56	63.5	78.5	105.8	0.4173	0.3772
284	FR 13 A	48.53	NA	260.485	NA	0.157393	NA	102	NA	36.5	55	98.75	124.25	0.259172	0.303941	121	115	NA	NA	NA	NA	NA	NA
285	IR 64-21	76.7025	65.935	86.965	94.49	0.47071	0.403439	114	110	34.3333	NA	67	NA	0.328342	NA	123	123	NA	NA	NA	NA	NA	NA
286	LI-JIANG-XIN-TUAN-HEI-GU	51.4575	NA	64.43	NA	0.438733	NA	96	97	30.25	NA	122.25	NA	0.218634	NA	104	106	NA	NA	NA	NA	NA	NA
287	M 202	81.0225	NA	88.7725	NA	0.480967	NA	99	NA	46.75	NA	75.5	NA	0.38736	NA	112	NA	NA	NA	NA	NA	NA	NA
288	MINGHUI 63	97.265	NA	160.002	NA	0.386711	NA	130	126	51.75	52.75	110.75	118	0.318607	0.300724	121	115	41.25	45.5	127	147.3	0.24553	0.2384
289	MOROBEREKAN	30.6125	NA	130.227	NA	0.19045	NA	134	NA	10.25	NA	52.5	NA	0.185725	NA	127	127	NA	NA	NA	NA	NA	NA
290	N 22	60.265	NA	88.1375	NA	0.395258	NA	98	100	26	21.5	49.25	57.25	0.324635	0.274835	113	117	29.75	30.67	56.5	78.7	0.338	0.2824
291	NIPPONBARE	45.485	53.665	55.0475	101.92	0.426997	0.362503	99	98	NA	NA	NA	NA	NA	NA	NA	NA	NA	NA	NA	NA	NA	NA
292	POKKALI	36.3225	NA	222.498	NA	0.154386	NA	116	116	20.75	NA	160.75	NA	0.114416	NA	127	129	NA	NA	NA	NA	NA	NA
293	SADU CHO	98.935	115.93	112.302	147.773	0.46704	0.445931	102	102	79	82.75	114.25	122.75	0.413598	0.402653	115	119	NA	NA	NA	NA	NA	NA
294	SANHUANGZHAN NO 2	112.267	111.477	125.36	144.753	0.472754	0.435026	116	114	47.75	41.5	117.25	92	0.289722	0.304704	127	125	NA	NA	NA	NA	NA	NA
295	SWARNA	NA	NA	NA	NA	NA	NA	NA	NA	NA	NA	NA	NA	NA	NA	NA	NA	NA	NA	NA	NA	NA	NA
296	TAINUNG 67	133.732	107.44	140.218	144.97	0.490484	0.424869	110	116	NA	NA	NA	NA	NA	NA	NA	NA	NA	NA	NA	NA	NA	NA
297	ZHENSHAN 97 B	67.2575	44.0475	83.6625	62.22	0.450651	0.41046	98	100	47.5	37	50.75	56.5	0.48498	0.373151	113	113	NA	NA	NA	NA	NA	NA
298	ASWINA	26.8925	14.68	150.92	50.47	0.187108	0.410546	110	112	75	75.75	103.25	123.25	0.421965	0.37907	113	117	NA	NA	NA	NA	NA	NA
299	CYPRESS	49.1	NA	64.1475	NA	0.439168	NA	108	104	22	NA	46.6667	NA	0.292305	NA	127	129	NA	NA	NA	NA	NA	NA
300	RAYADA	NA	NA	NA	NA	NA	NA	NA	NA	NA	NA	NA	NA	NA	NA	NA	NA	NA	NA	NA	NA	NA	NA
